# Supplementary material for: Pyridine-phosphinimine ligand-accelerated Cu(i)-catalyzed azide–alkyne cycloaddition for preparation of 1-(pyridin-2-yl)-1,2,3-triazole derivatives
Source: Royal Society of Chemistry journal article supplement (doi:10.1039/c4ob01176g), 2014-06-18
Supplement: c4ob01176g1.pdf [file c4ob01176g1.pdf]

Pyridine-Phosphinimine Ligands-Accelerated Cu(I)-Catalyzed  
Azide-Alkyne Cycloaddition for Preparation of  
1-( Pyridin-2-yl)-1,2,3-Triazole Derivatives

**Supporting Information**

Ranfeng Sun, Huangdong Wang, Jianfeng Hu, Jiudong Zhao and Hao Zhang\*

College of Chemistry and Chemical Engineering, Inner Mongolia University, Hohhot 010021, P. R.

China

\* Corresponding author. haozhang@imu.edu.cn; zh\_hjf@hotmail.com.

**Table of Contents**

S2 – S33  $^1\text{H}$ ,  $^{13}\text{C}$  and  $^{31}\text{P}$  NMR spectra for all compounds.

S34 – S39 Crystal data for compound 3a.

$^1\text{H}$ ,  $^{13}\text{C}$  and  $^{31}\text{P}$  NMR spectra for all compounds.

Tetrazolo[1,5-*a*]pyridine (2a)

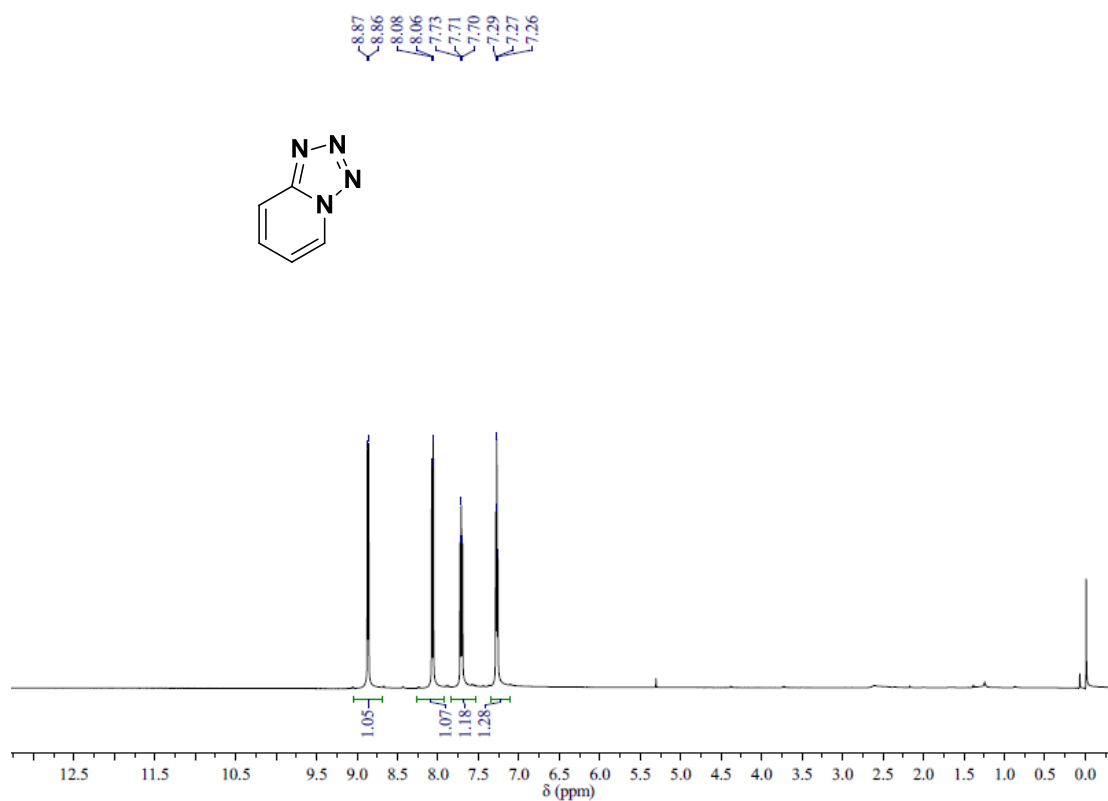

8-Chlorotetrazolo[1,5-*a*]pyridine (2b).

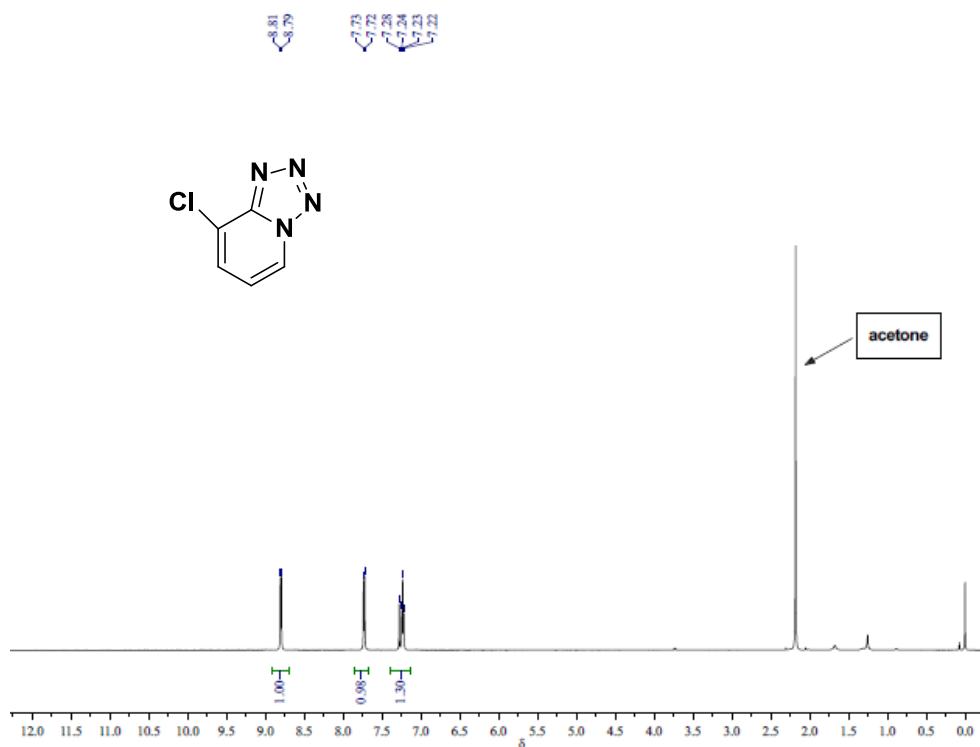

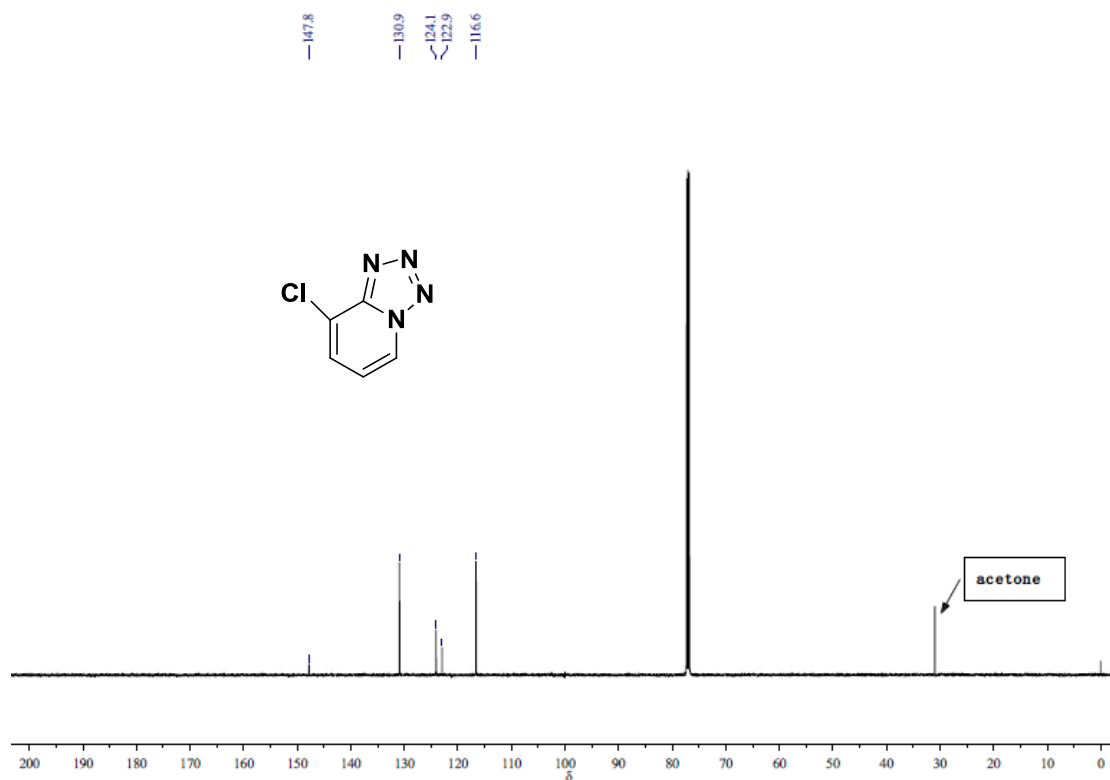

**Tetrazolo[1,5-*a*]pyridine-8-carboxylic acid (2c).**

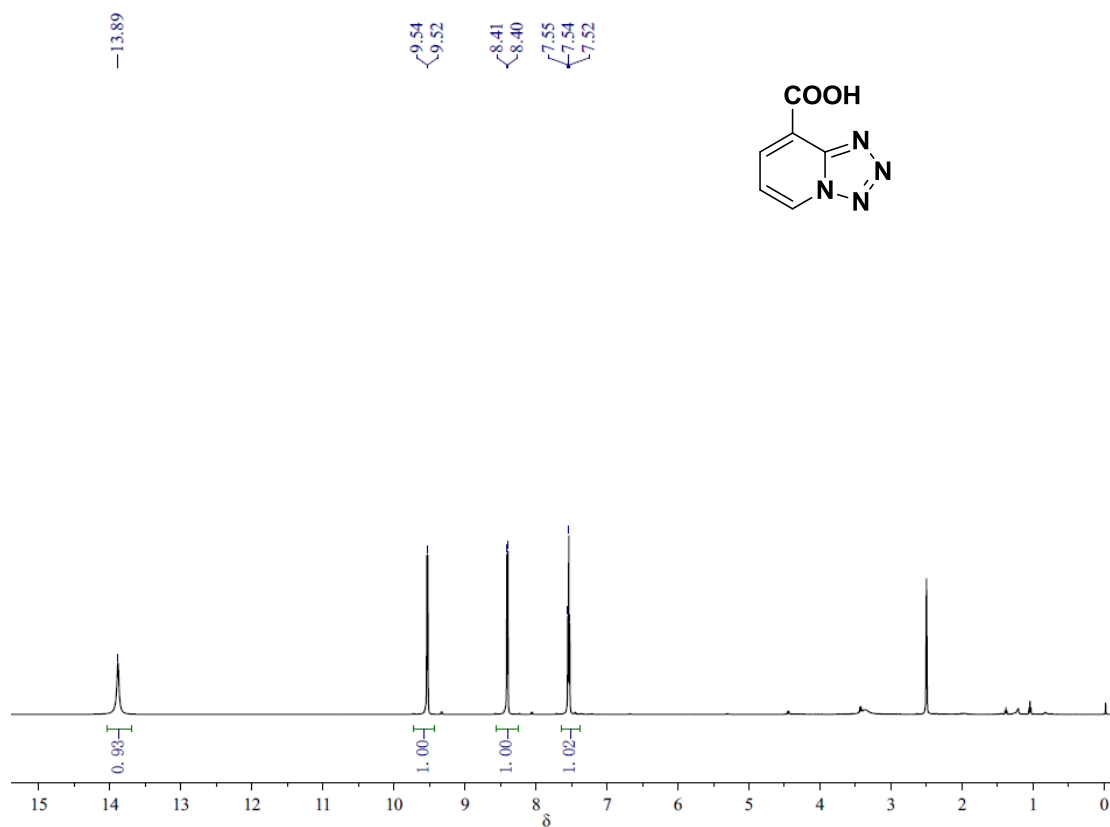

8-Nitrotetrazolo[1,5-a]pyridine (2d).

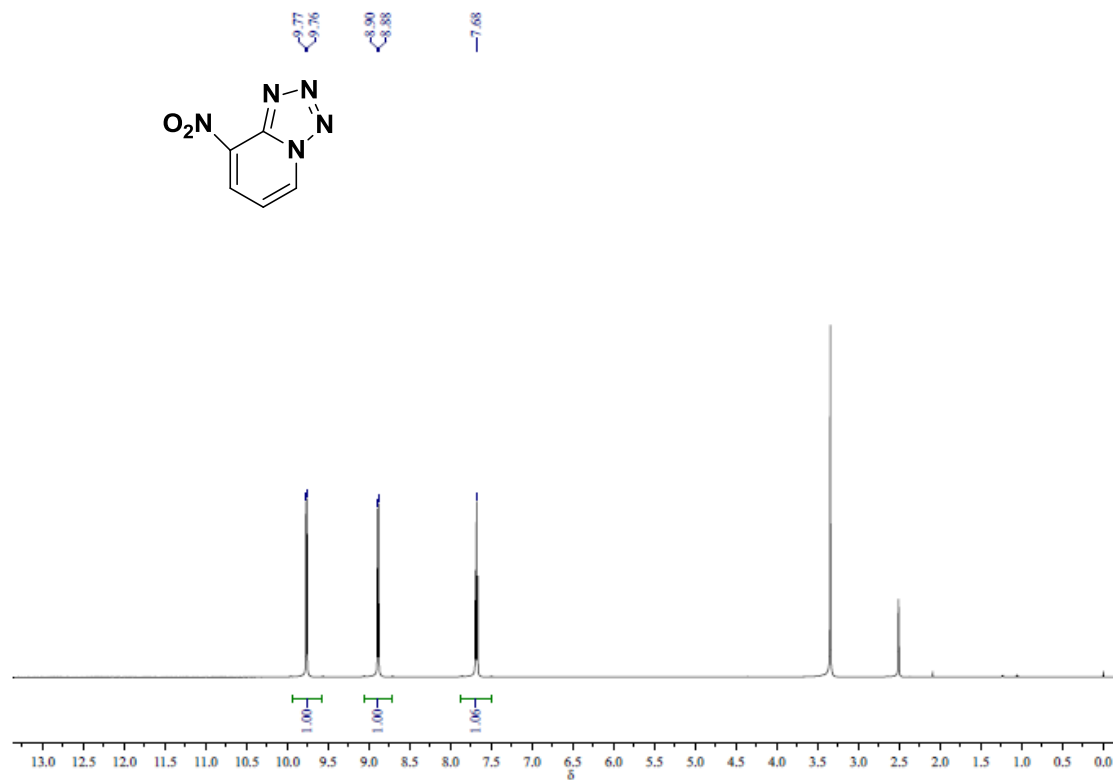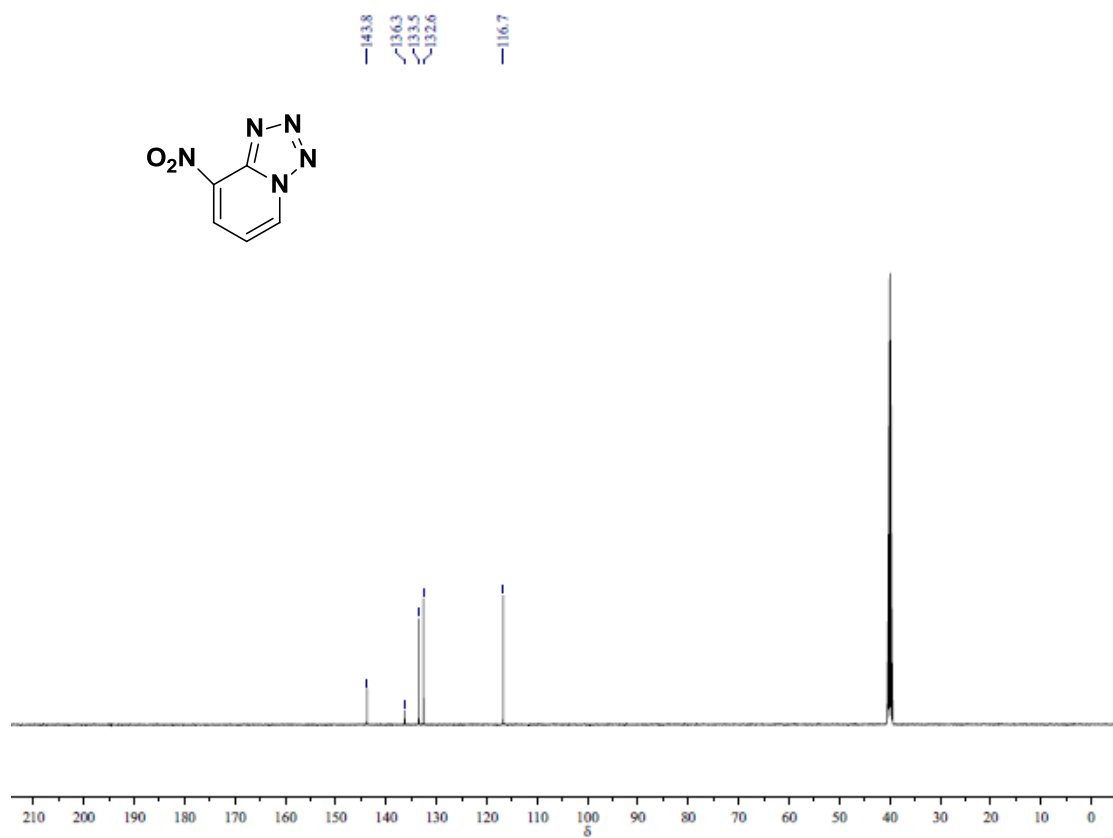

**Ferrocenyl acetylene (1a).**

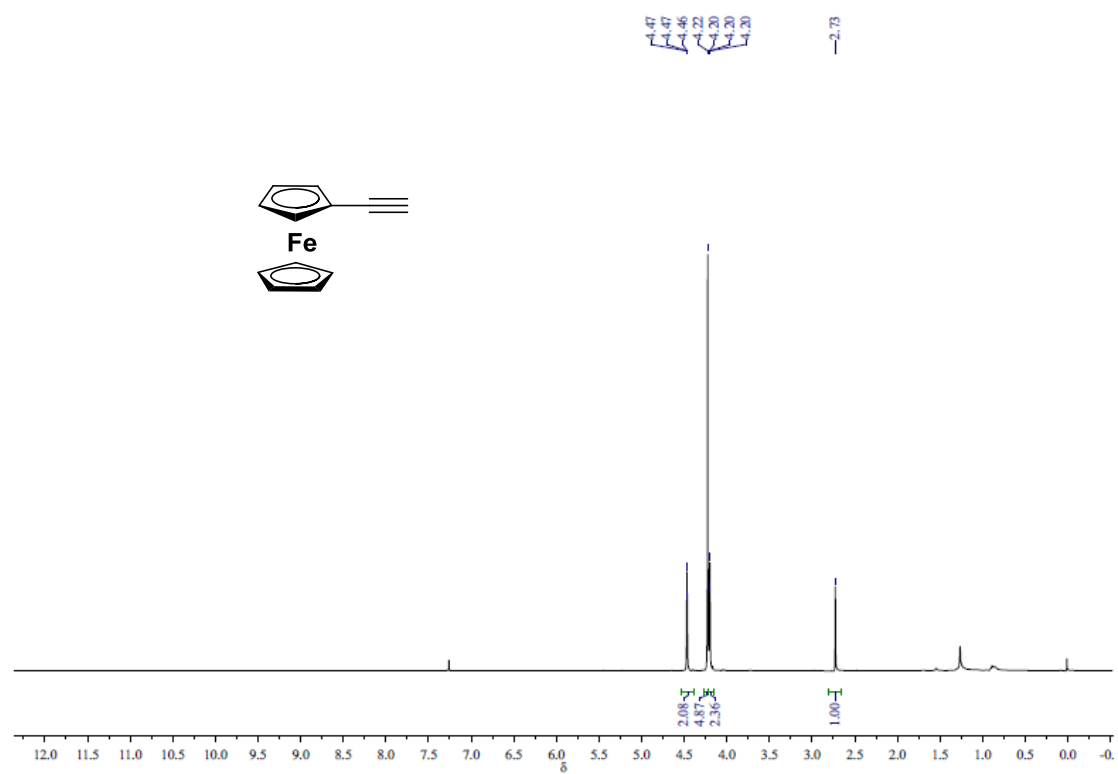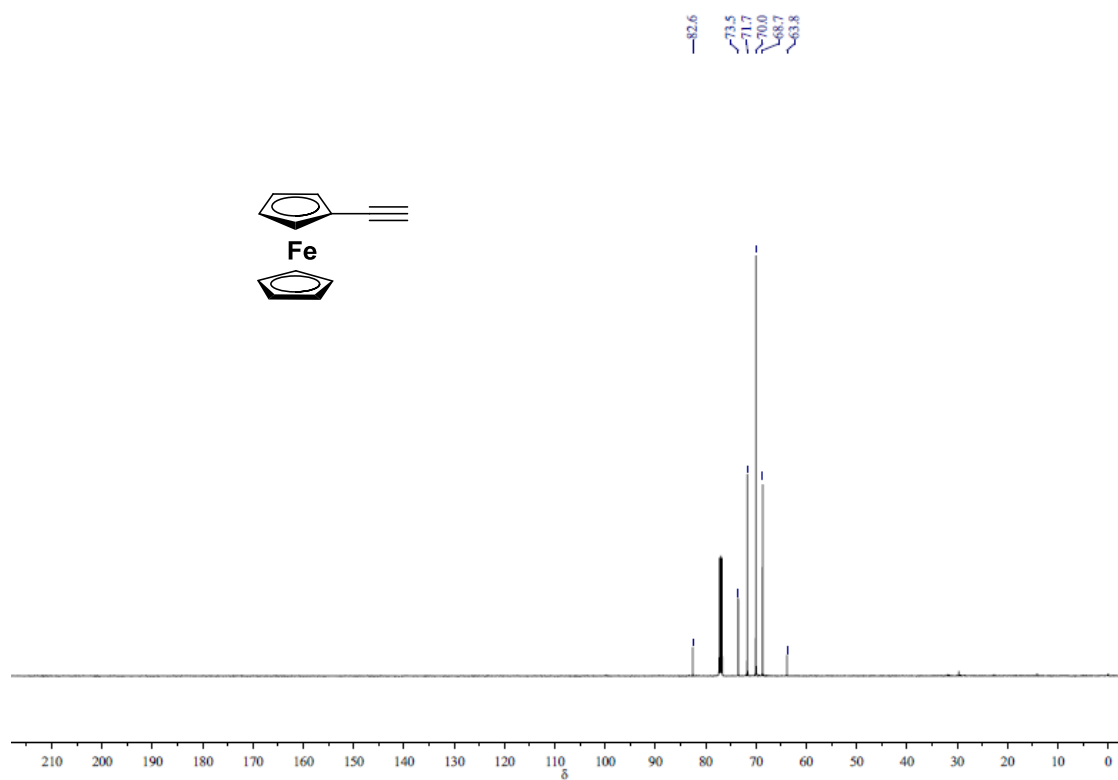

(2-Pyridyl)-CH<sub>2</sub>-N=PPh<sub>3</sub> (L<sub>1</sub>).

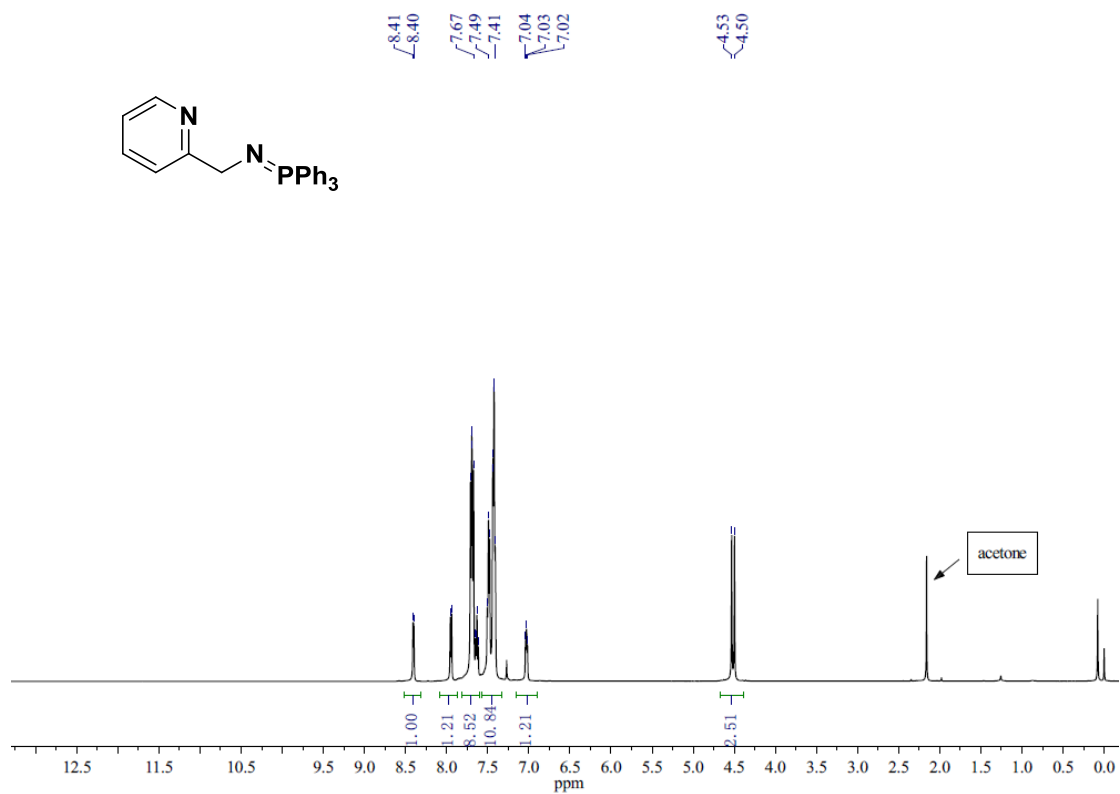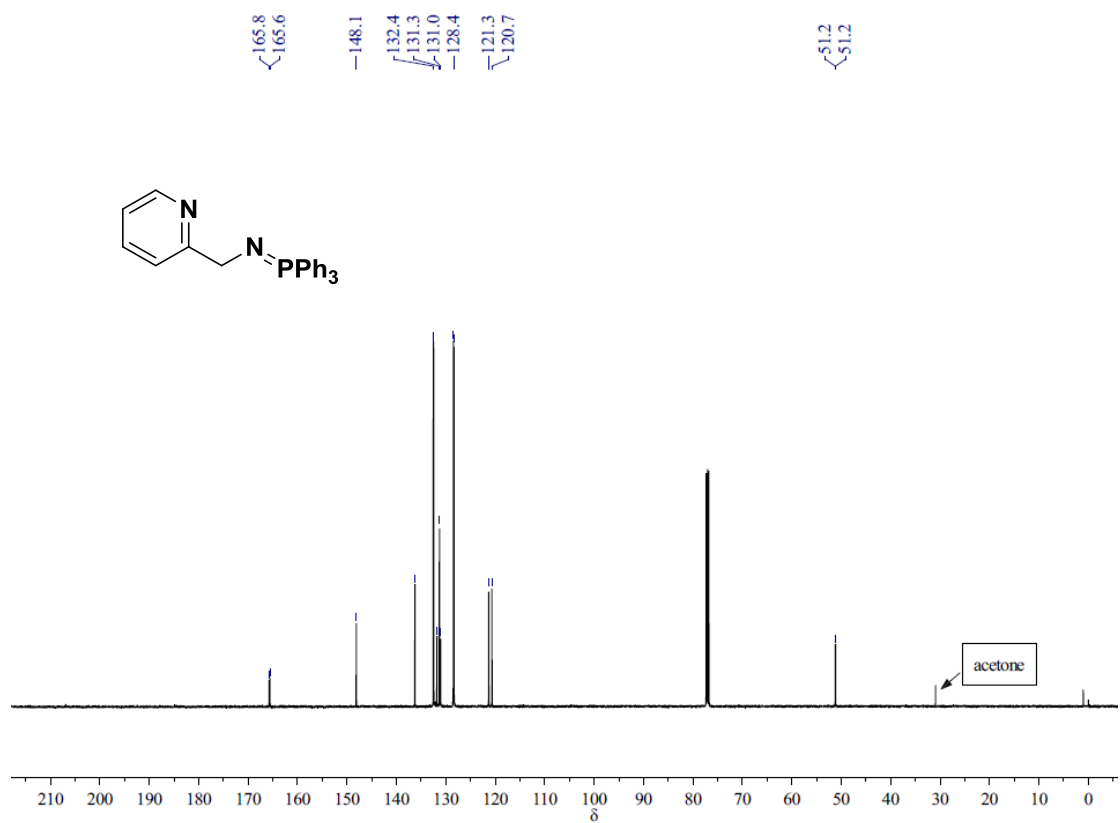

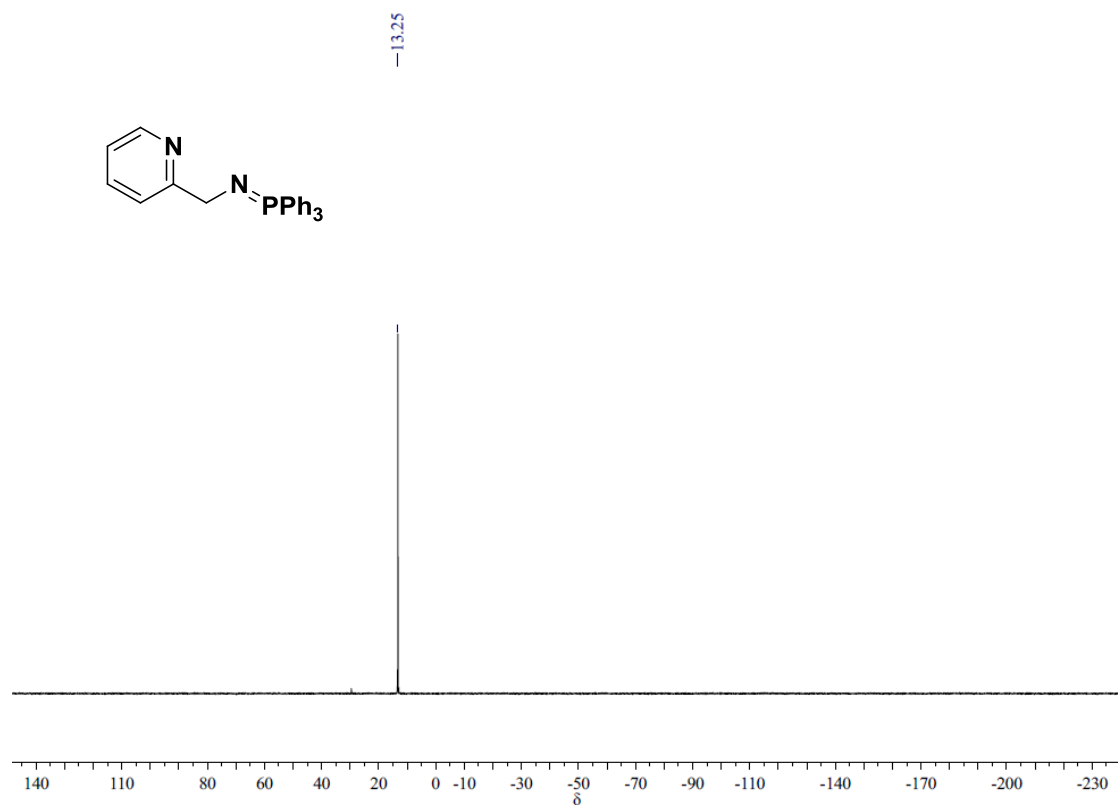

**3-Chloro-N-(triphenylphosphoranylidene)propan-1-amine (L<sub>2</sub>).**

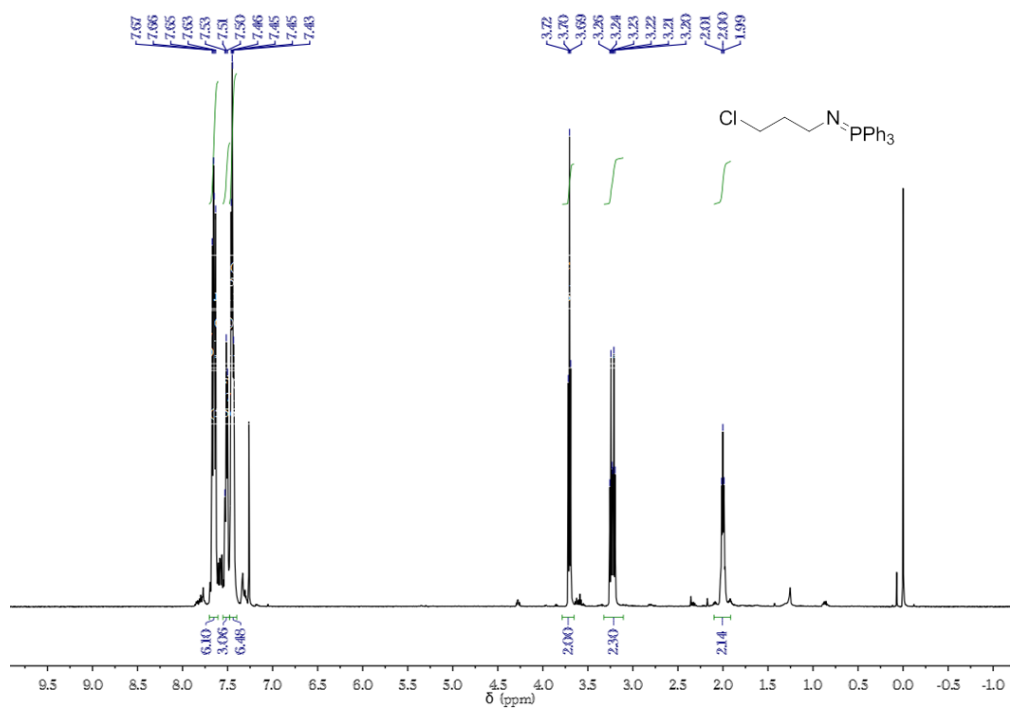

1,1,1-Trimethyl-N-(triphenylphosphoranylidene)silanamine (L<sub>3</sub>).

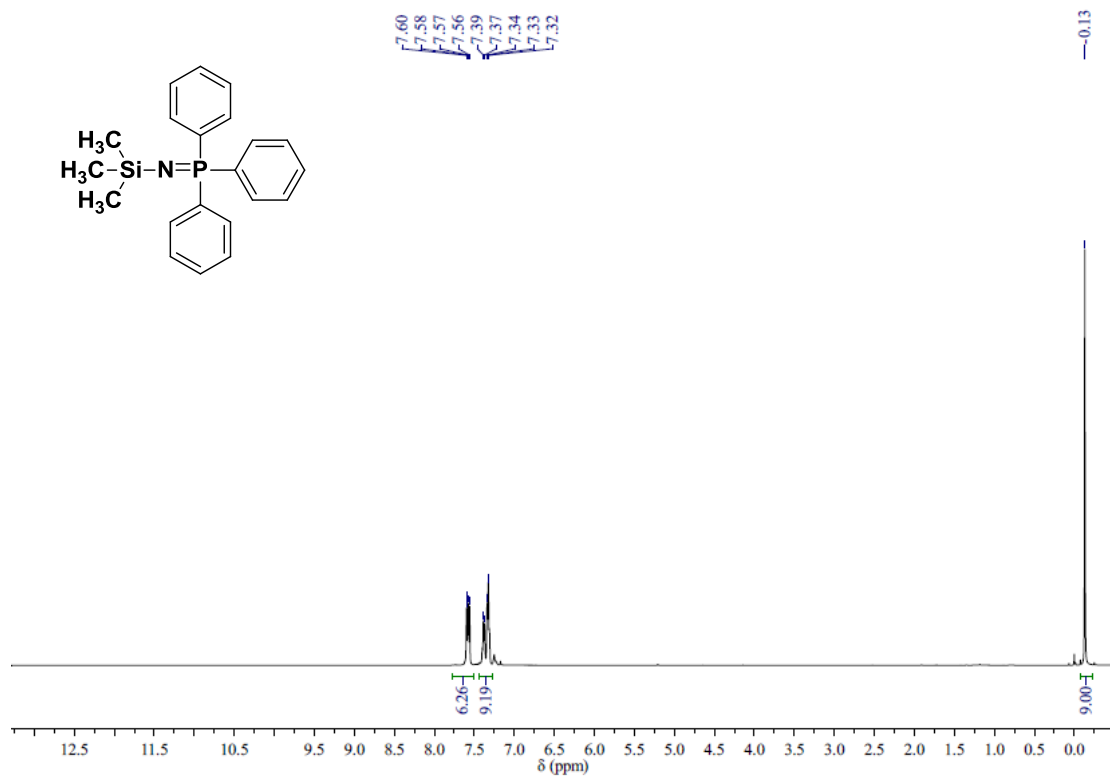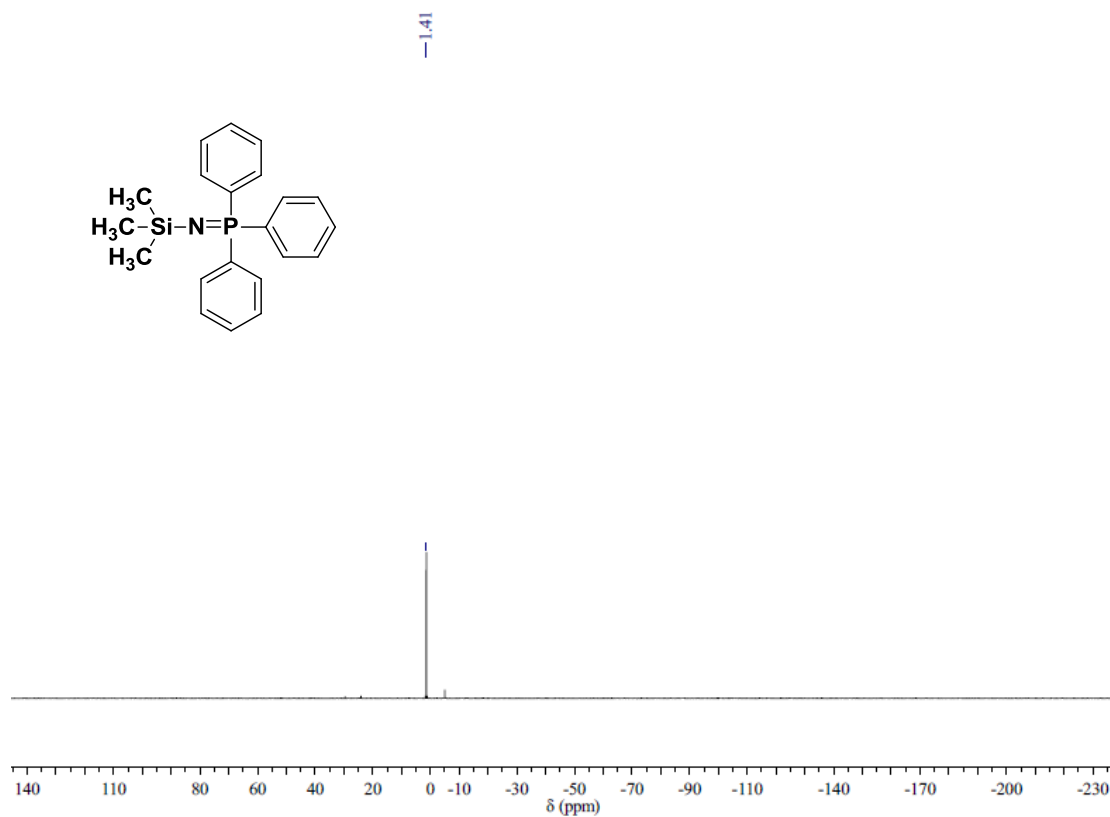



**1,1,1-Trimethyl-N-(tricyclohexylphosphoranylidene)silanamine (L<sub>4</sub>).**

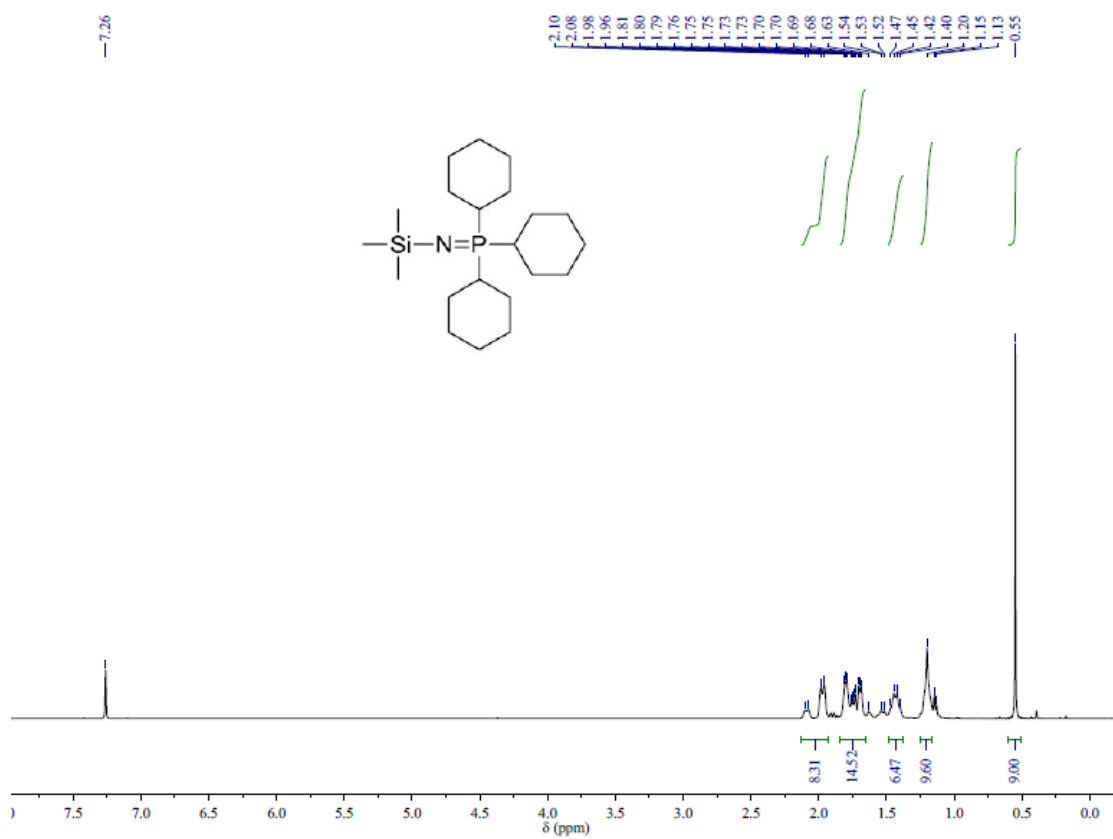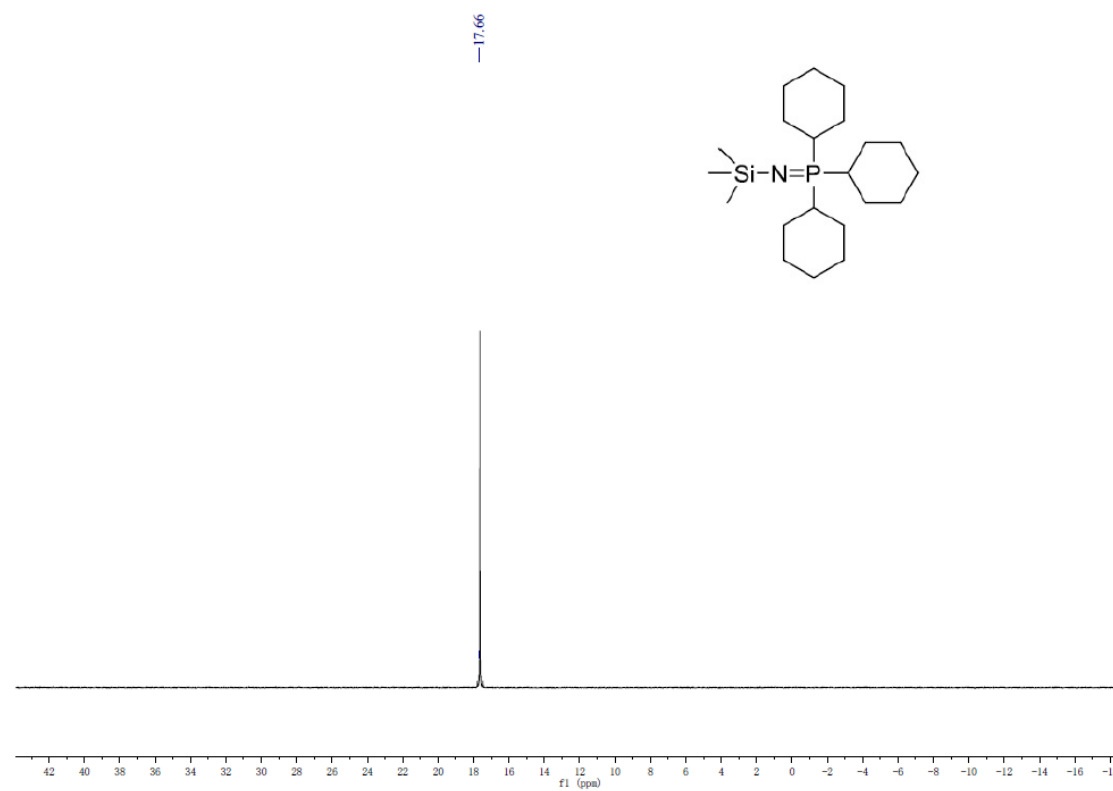

***N*-(triphenylphosphoranylidene)aniline (**L**<sub>5</sub>).**

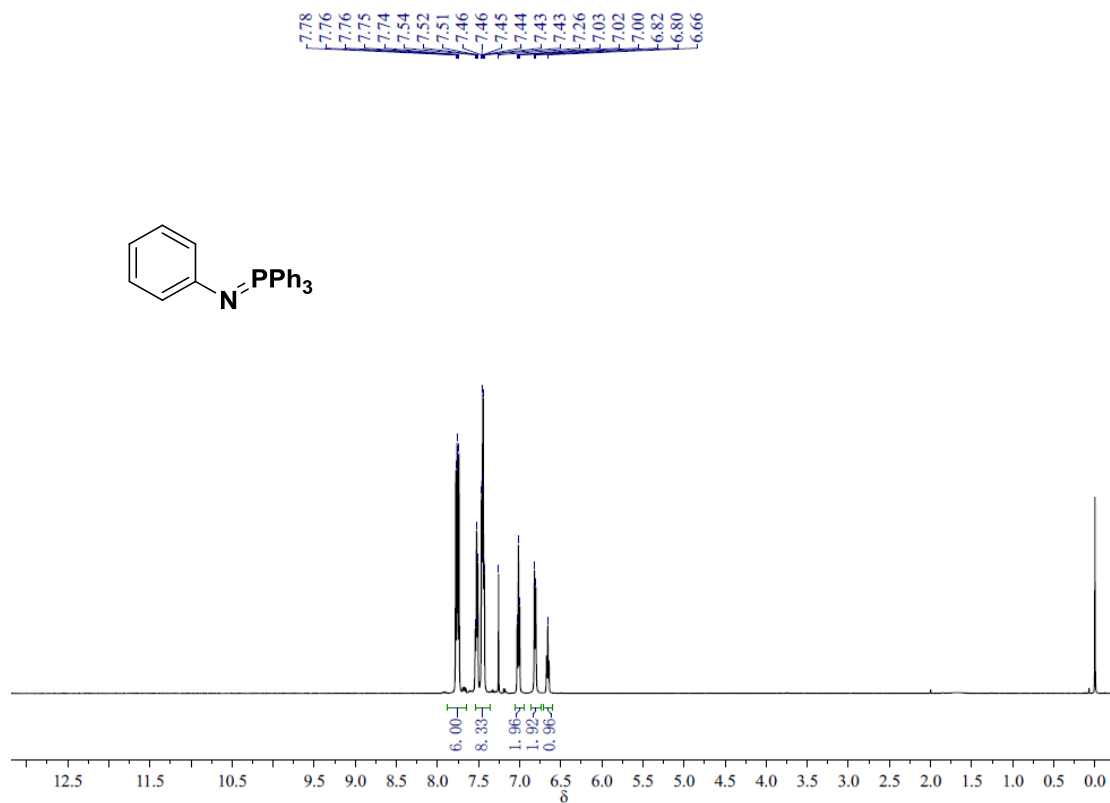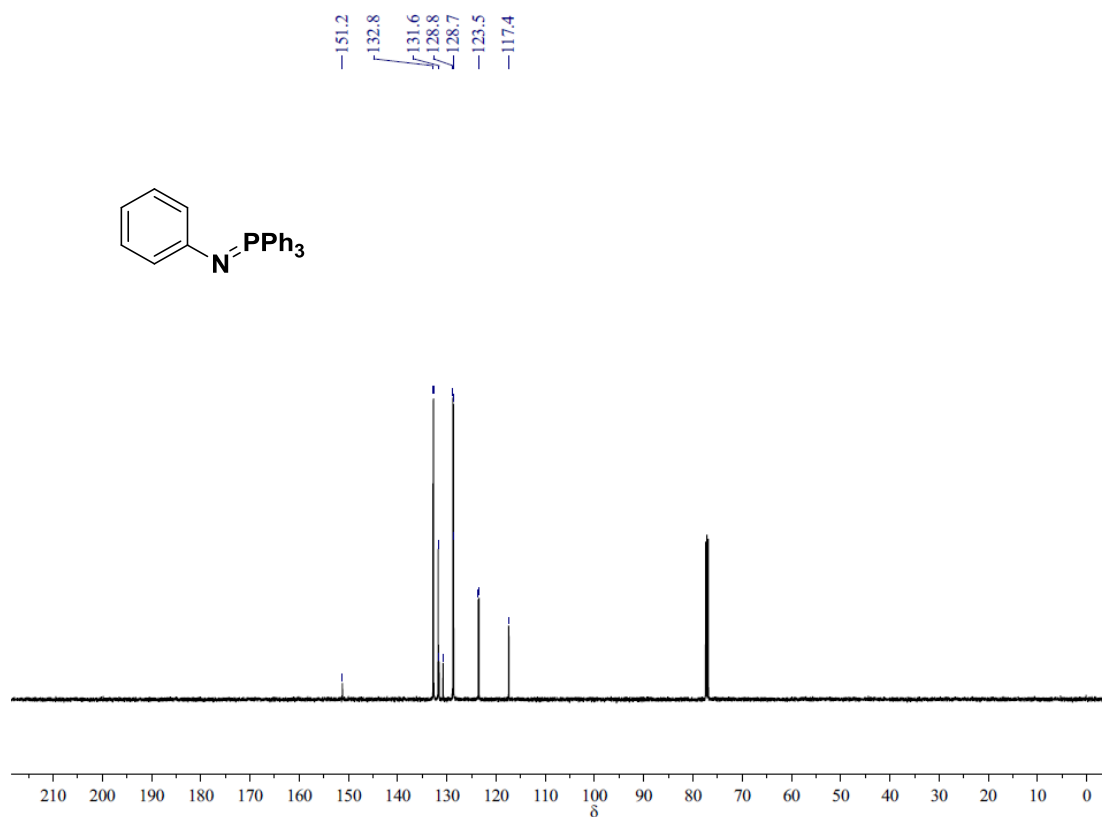

***N*-(triphenylphosphoranylidene)pyridin-2-amine (L<sub>6</sub>).**

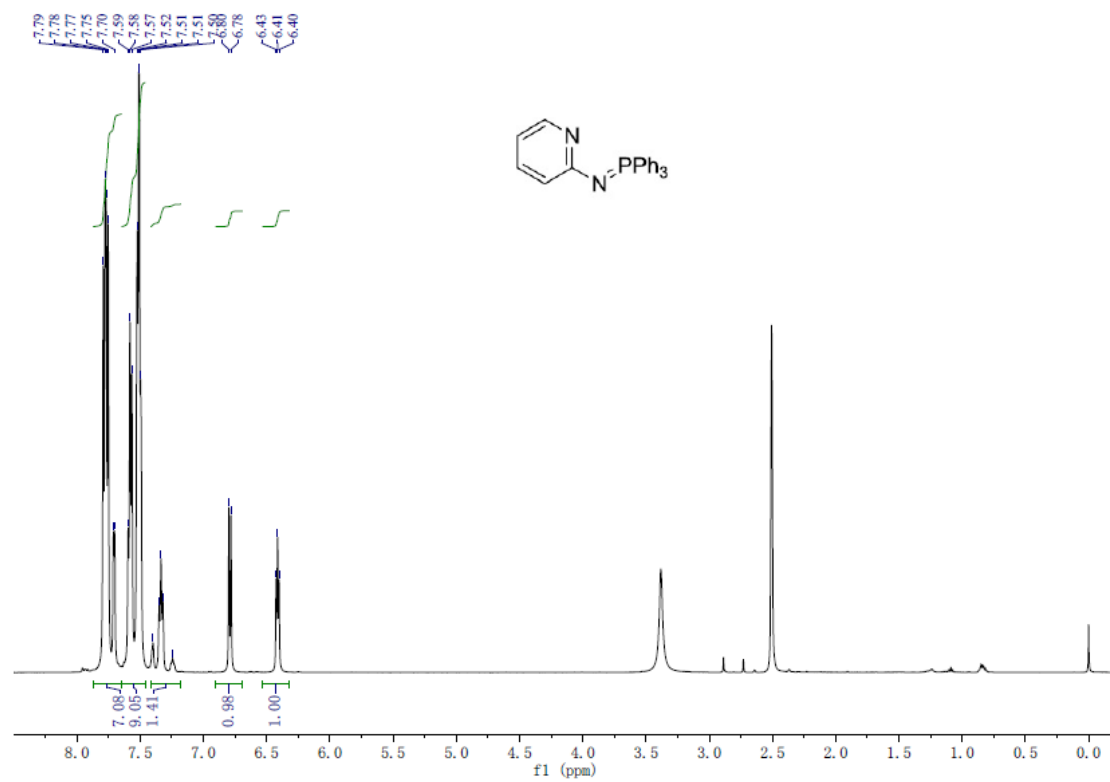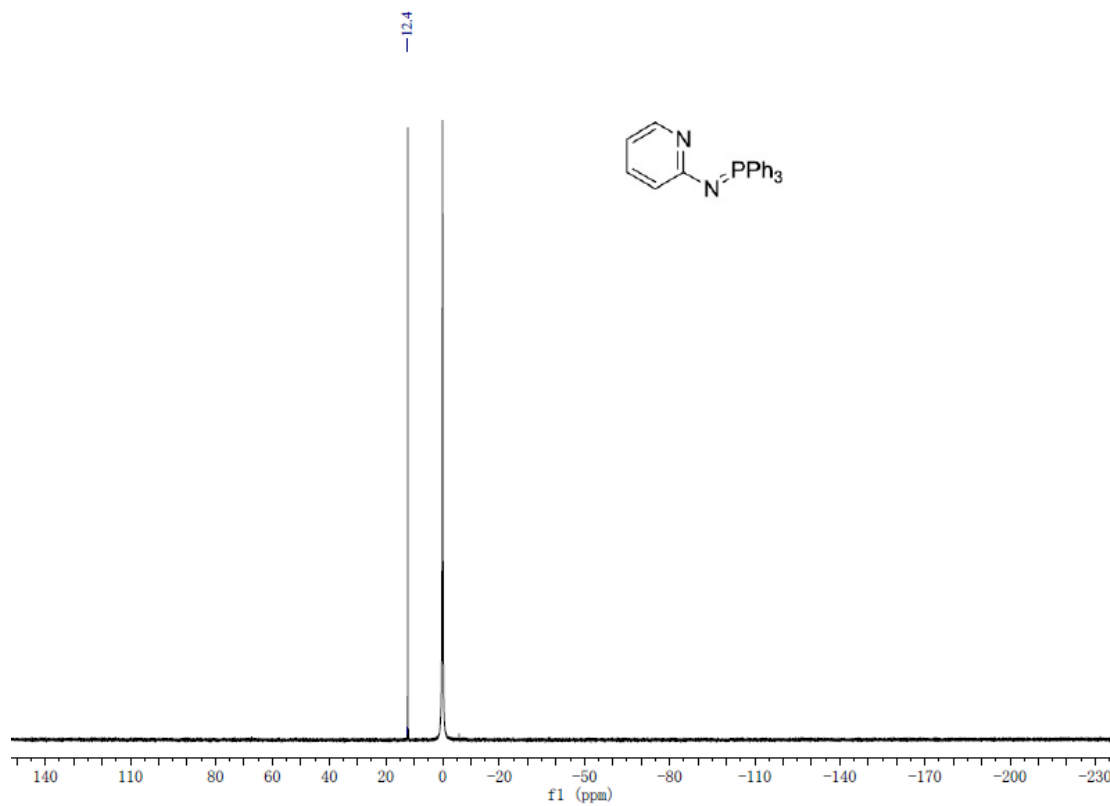

(2-Pyridyl)-CH<sub>2</sub>-N=PCy<sub>3</sub> (L<sub>7</sub>).

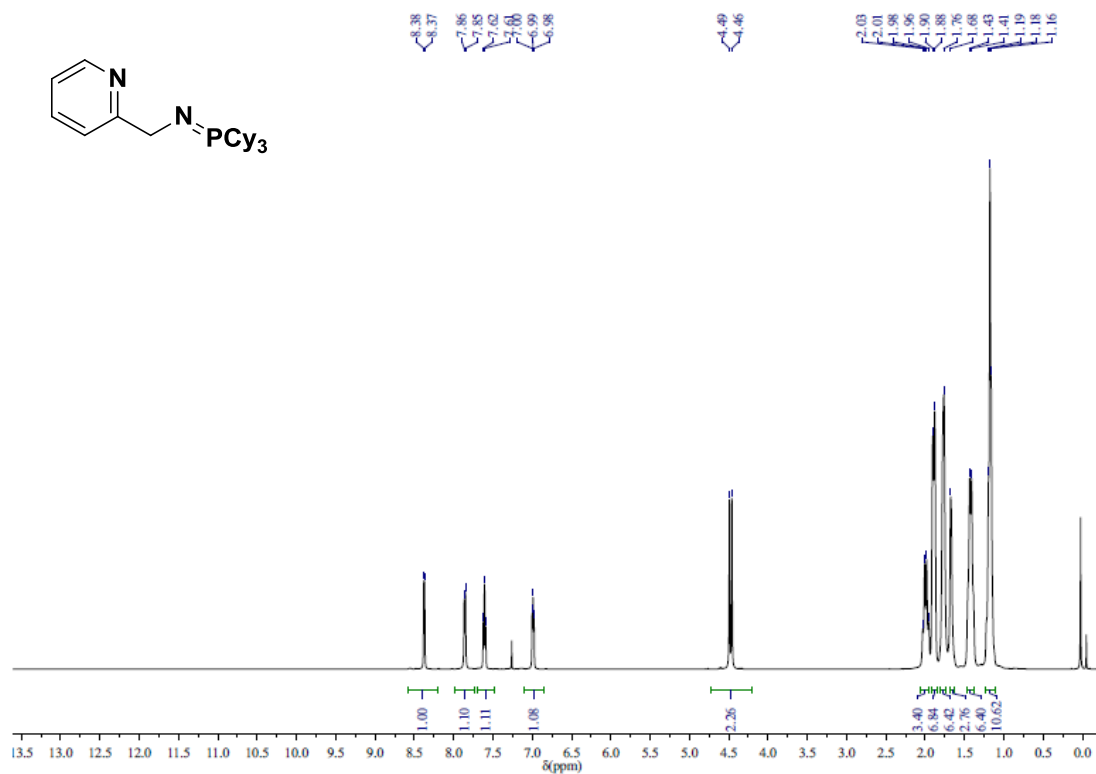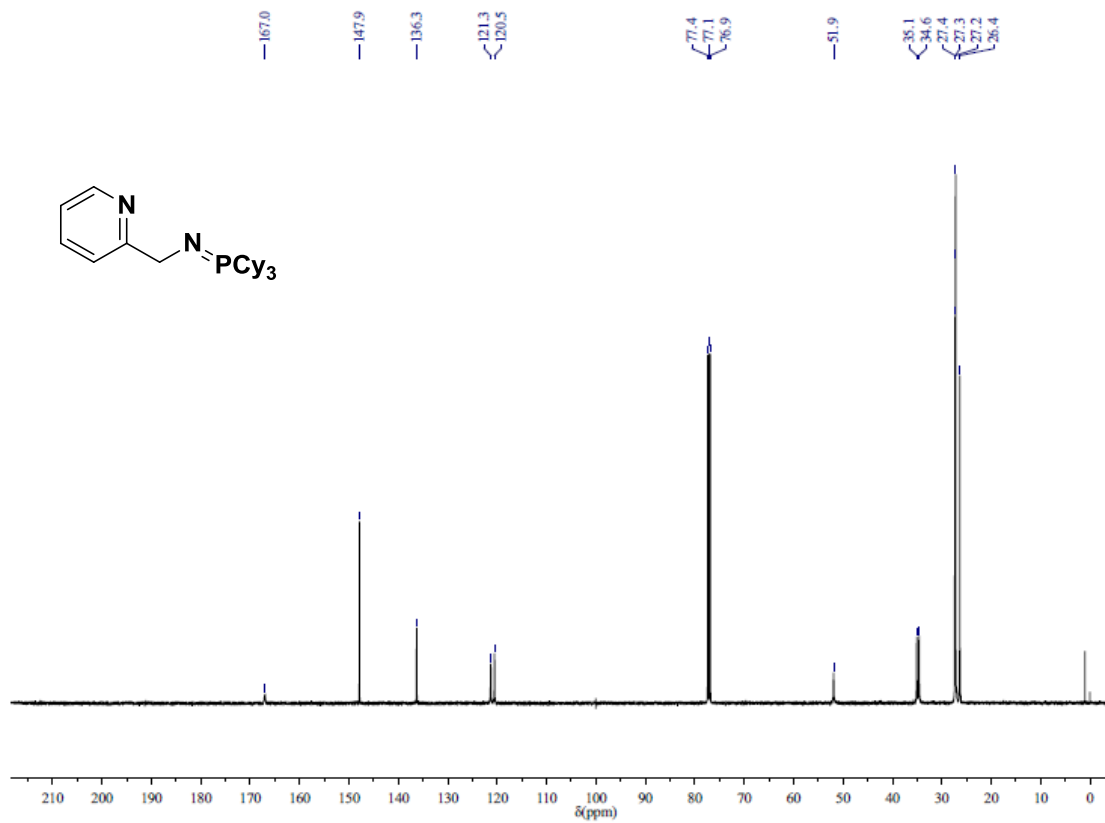

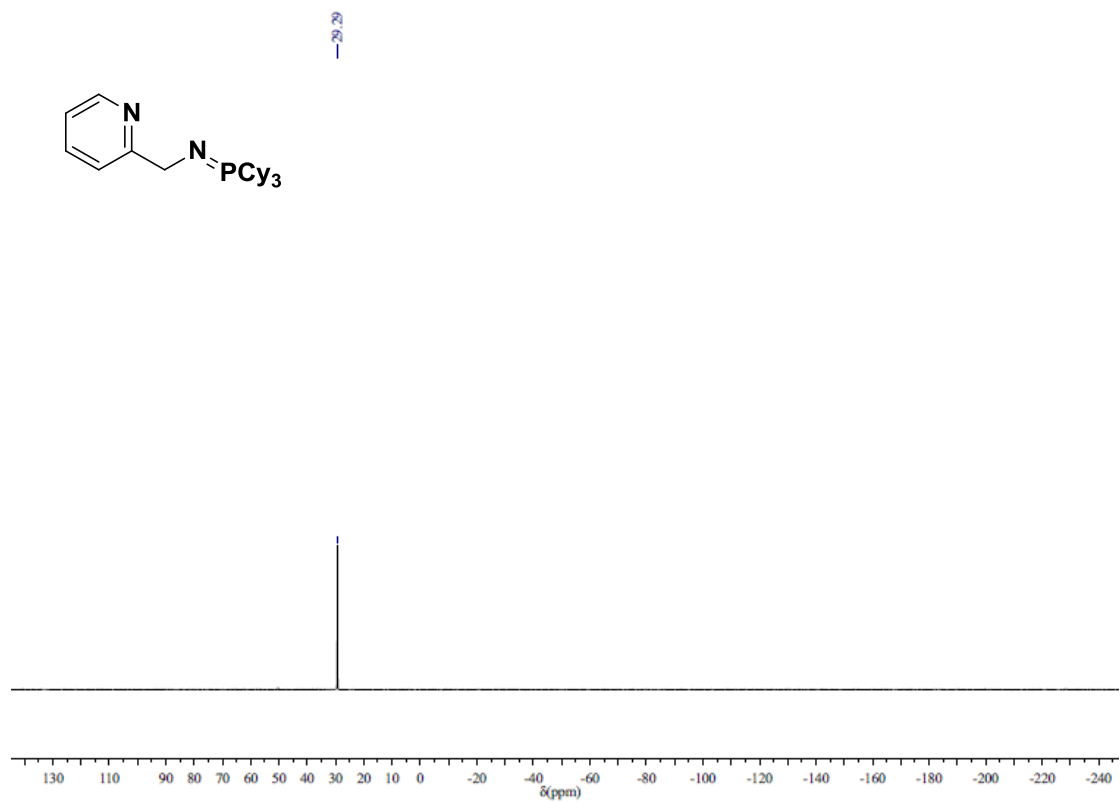

***N*-(tri-*tert*-butylphosphoranylidene)pyridin-2-amine (**L<sub>8</sub>**).**

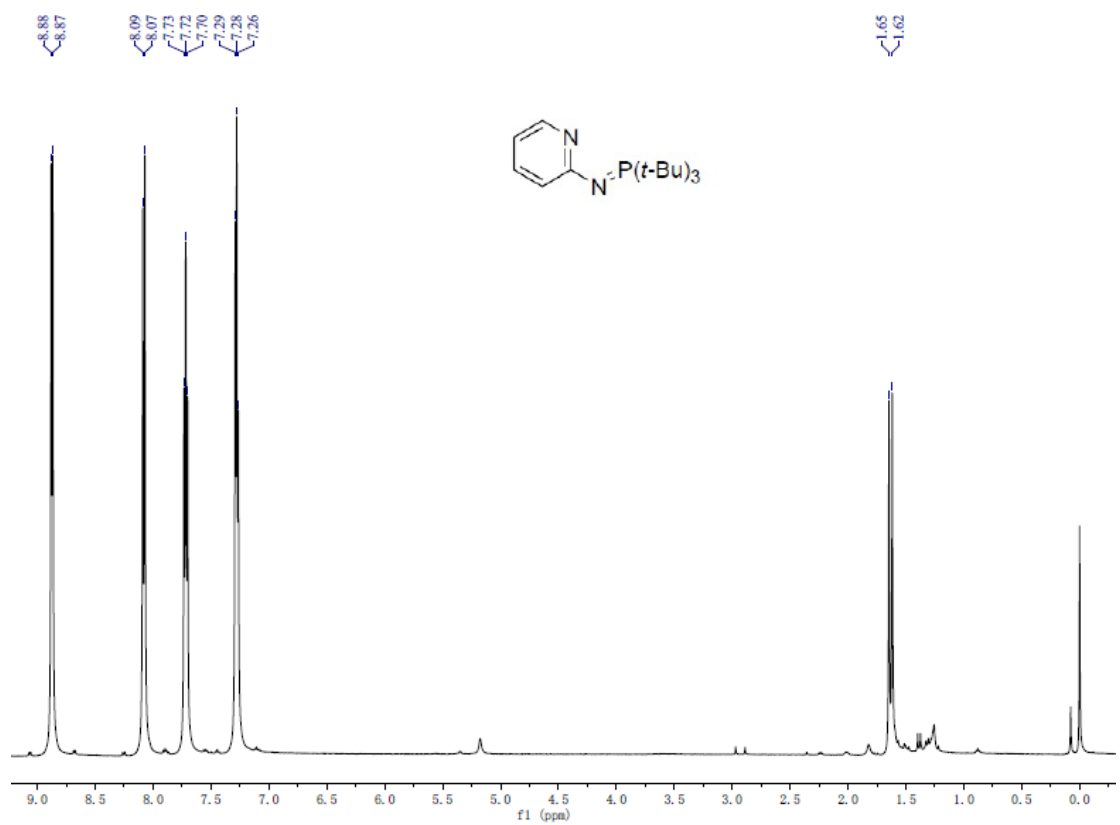

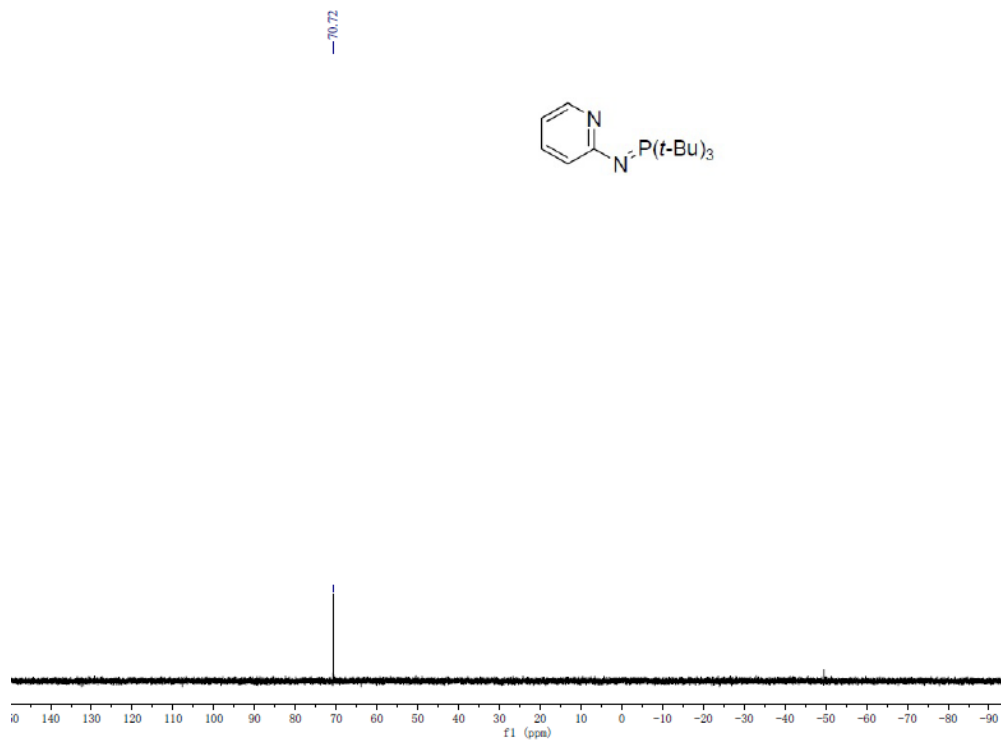

**(2-Pyridyl)-CH<sub>2</sub>-N=P<sup>t</sup>Bu<sub>3</sub> (L<sub>9</sub>).**

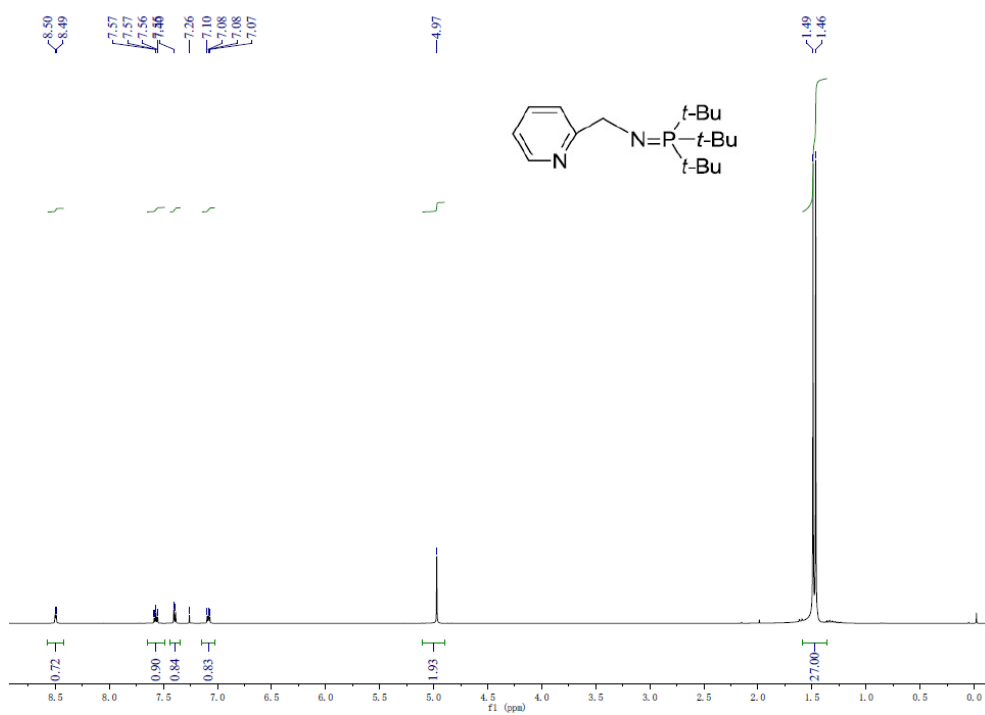

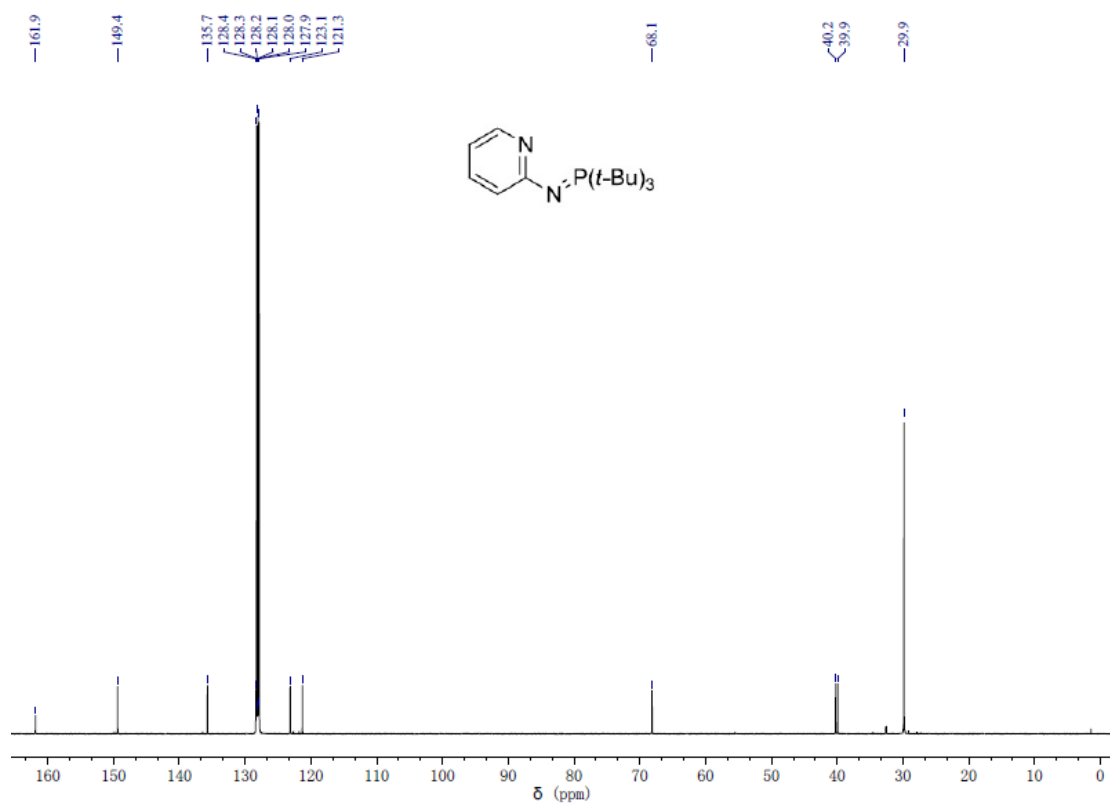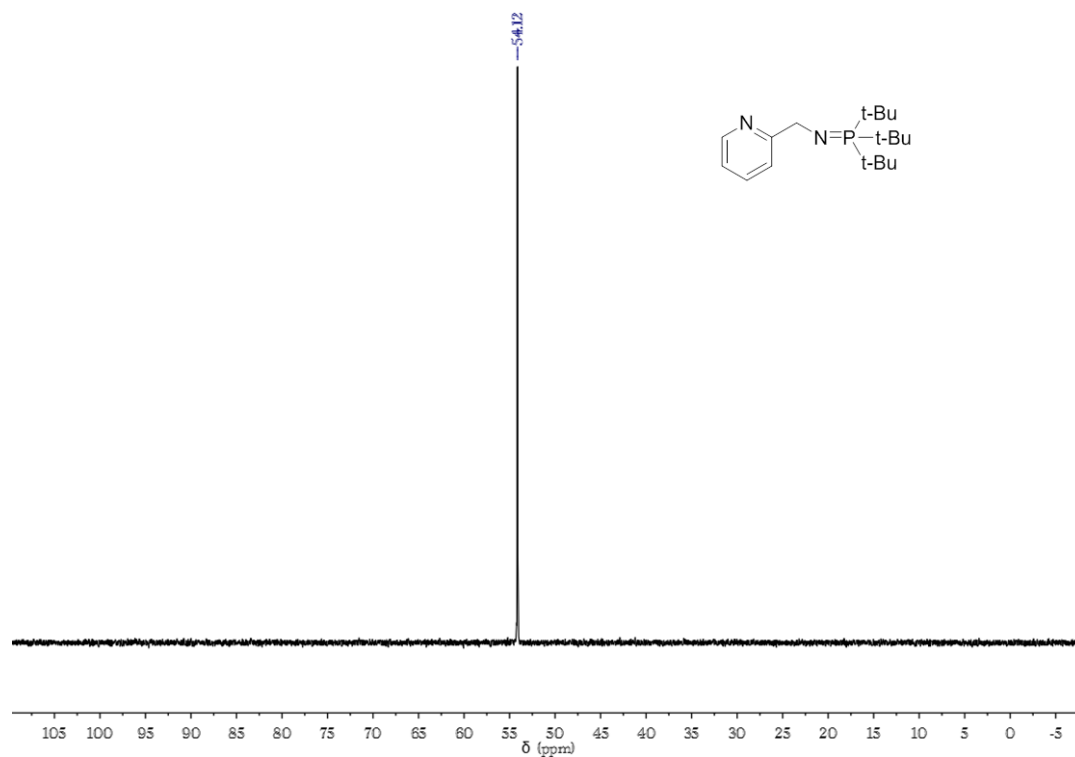

**2-((Diphenylphosphino)methyl)pyridine (L<sub>10</sub>).**

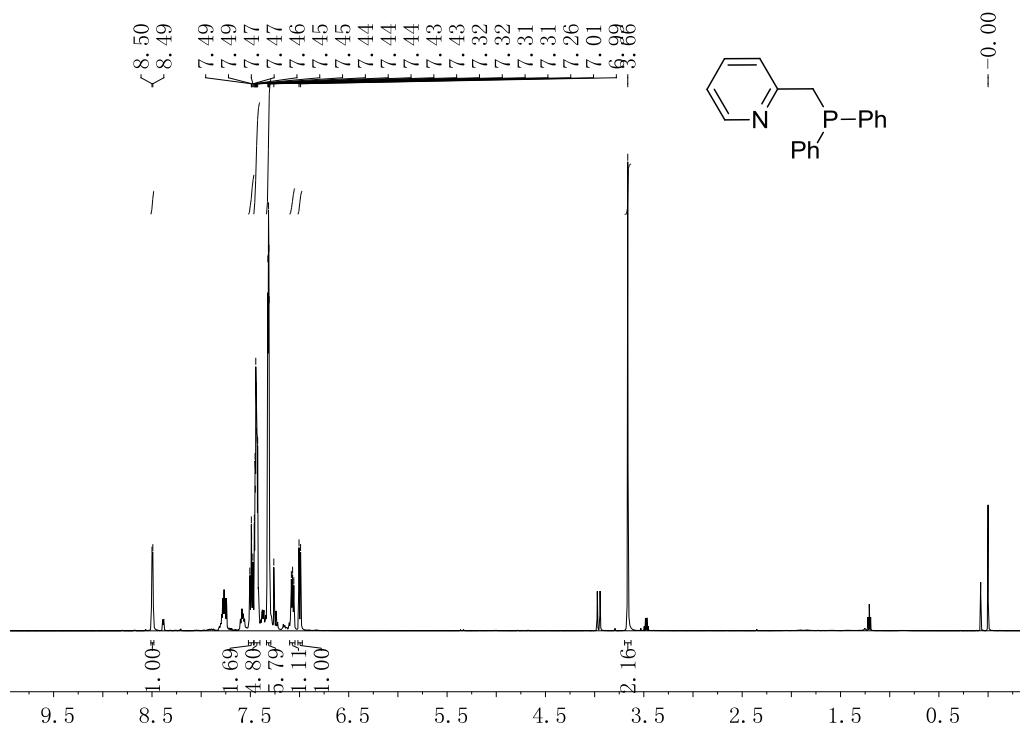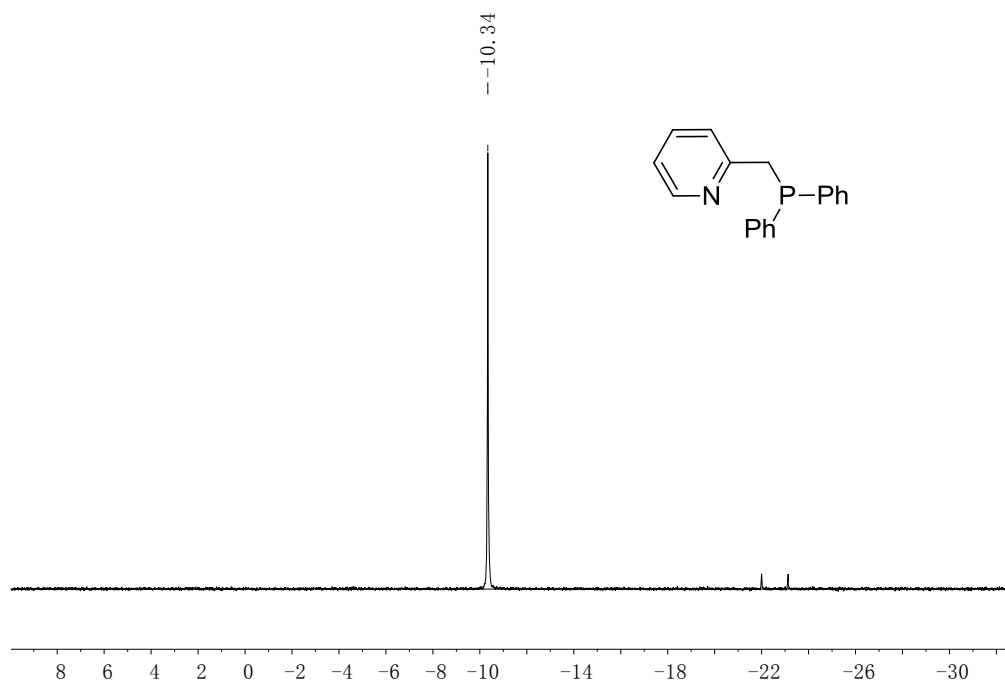



# TBTA

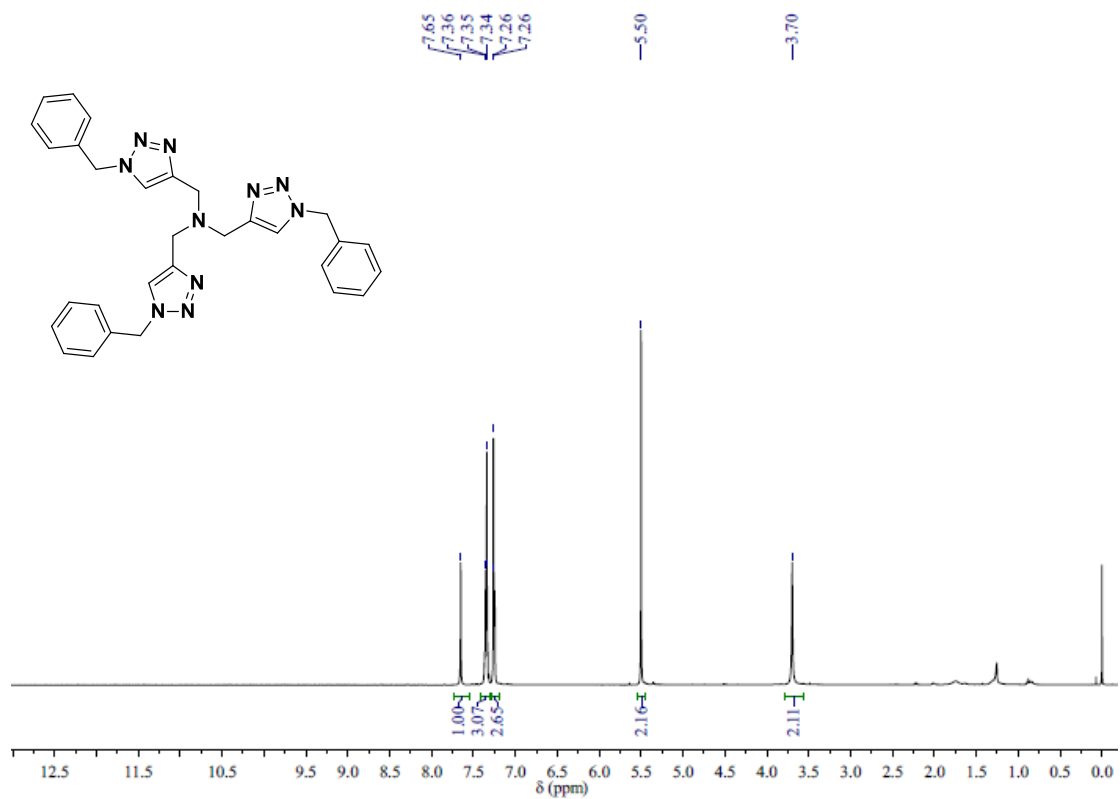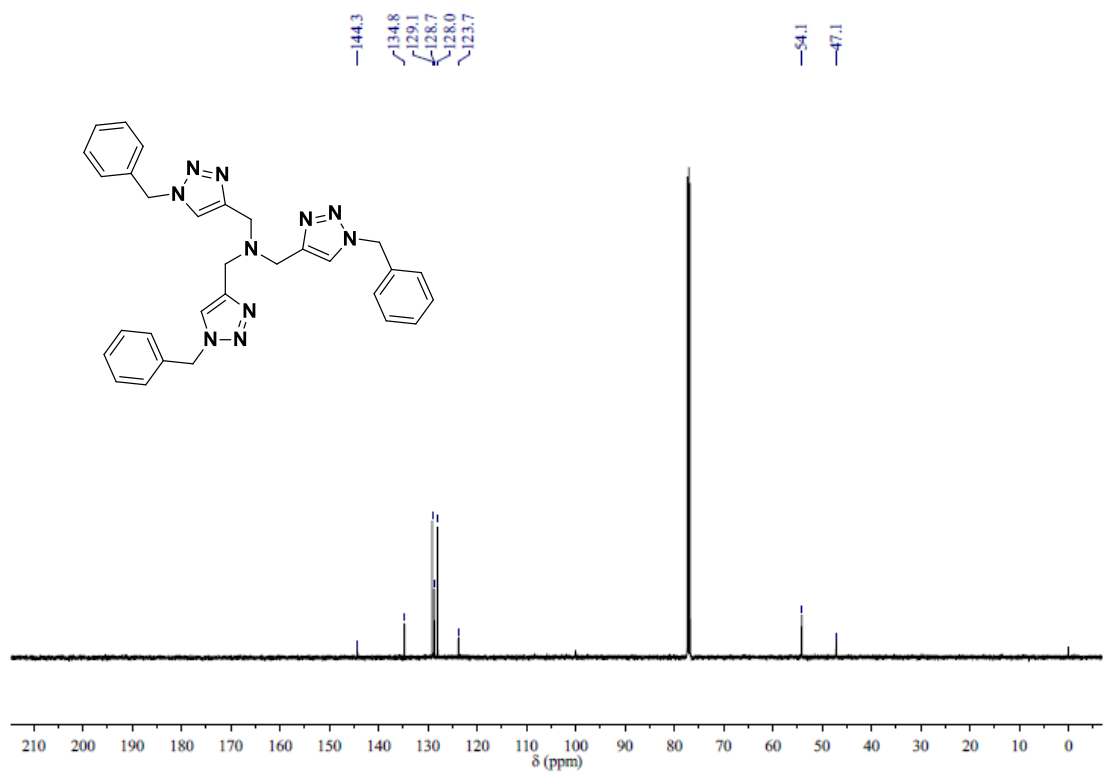

Compound 3a.

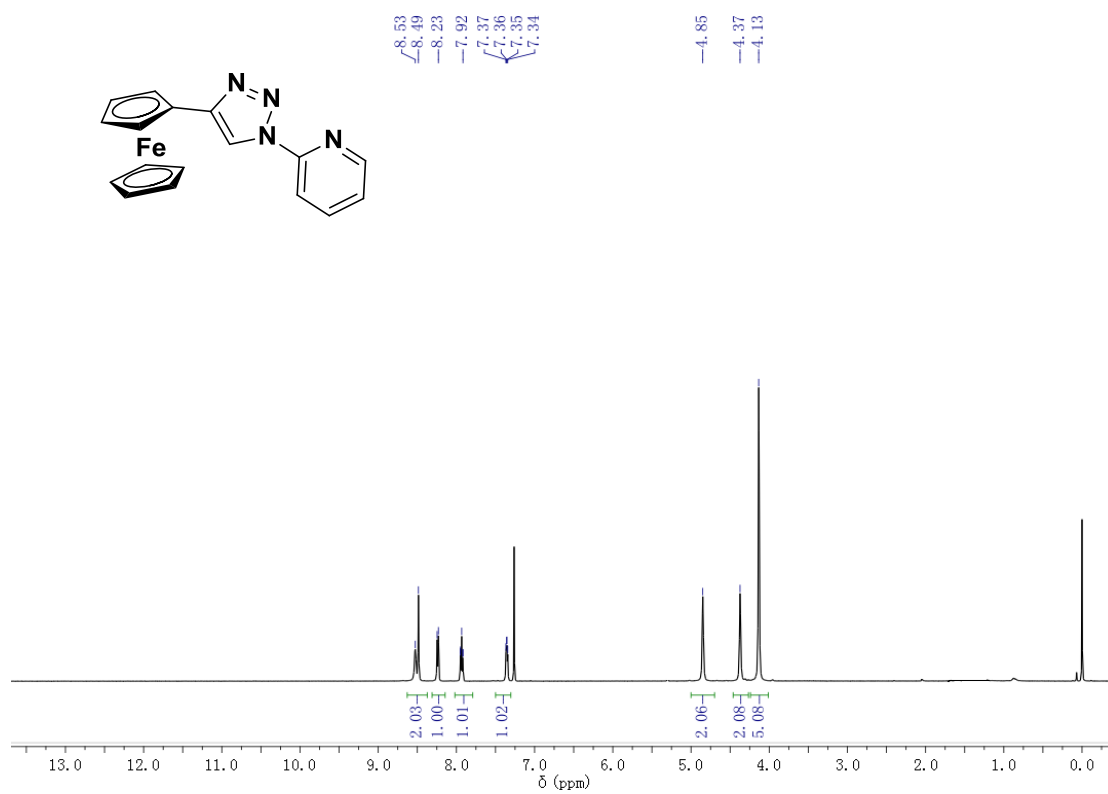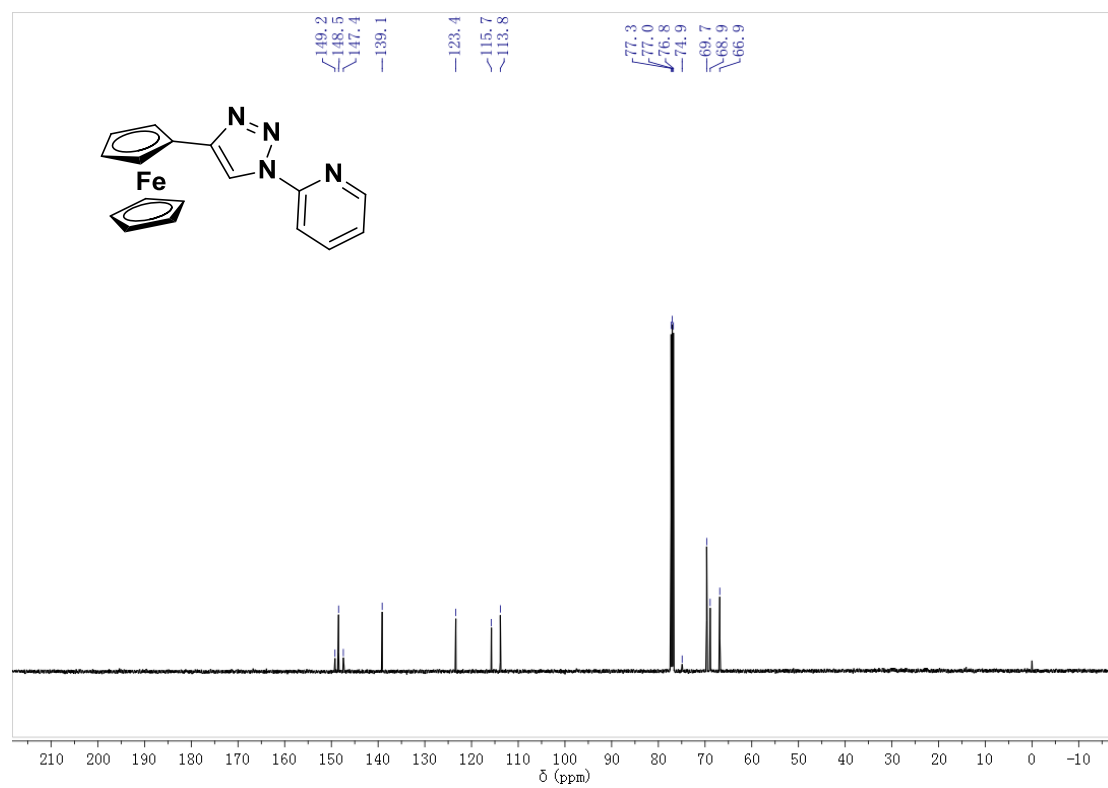

Compound 3b.

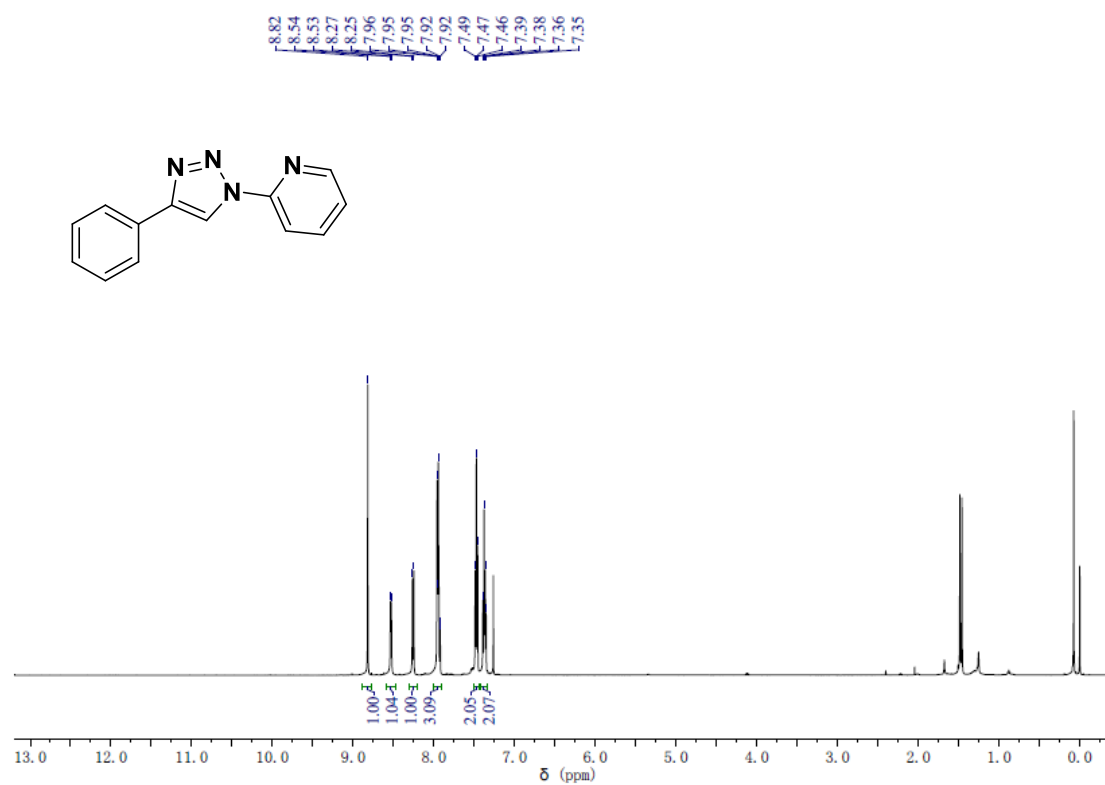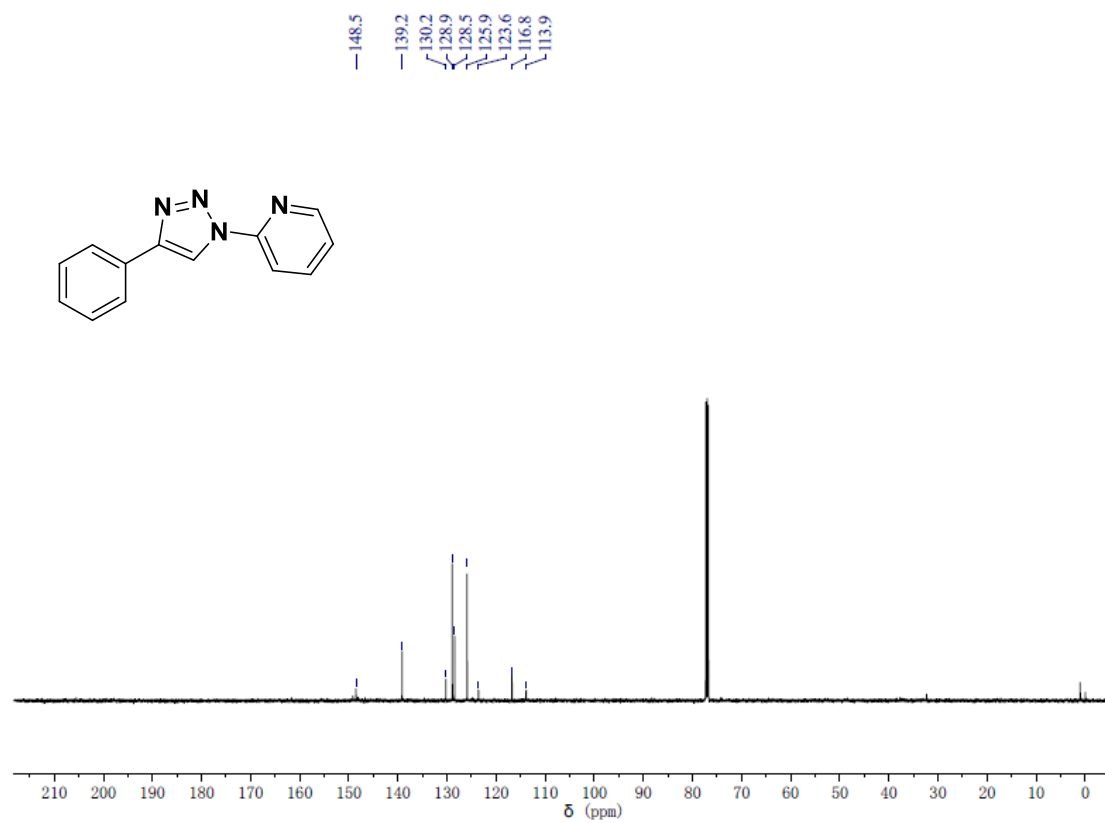

Compound 3c.

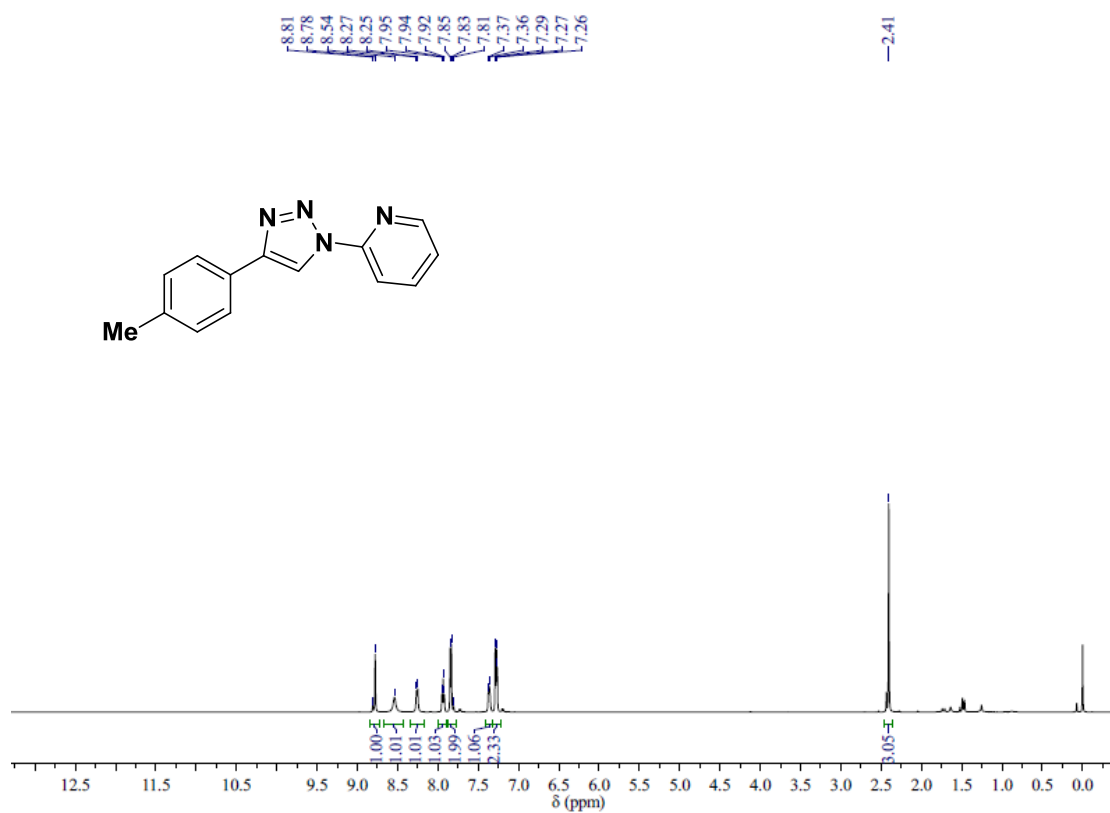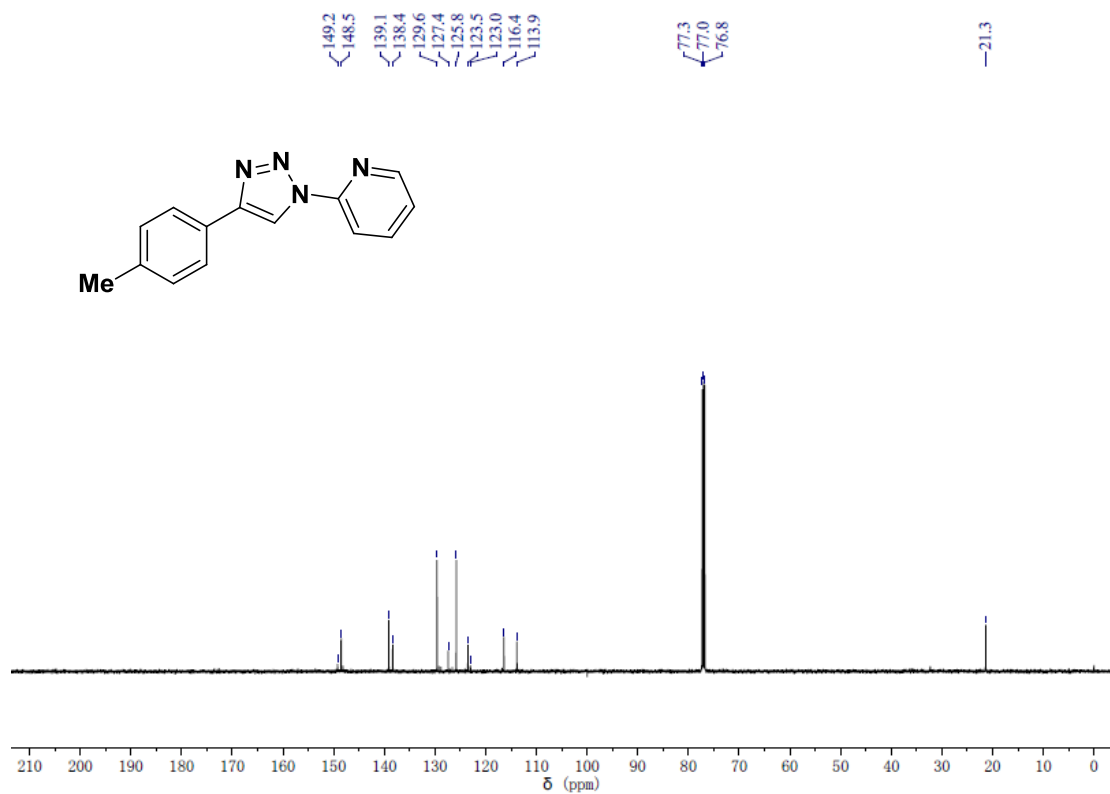

Compound 3d.

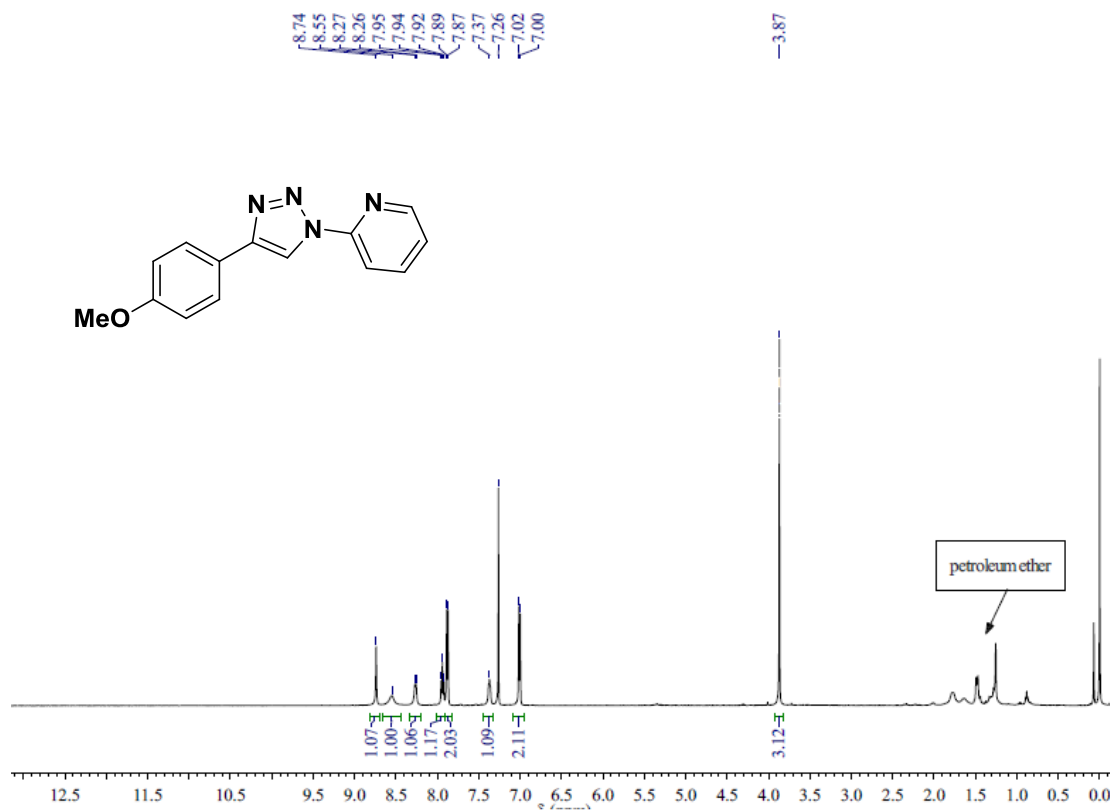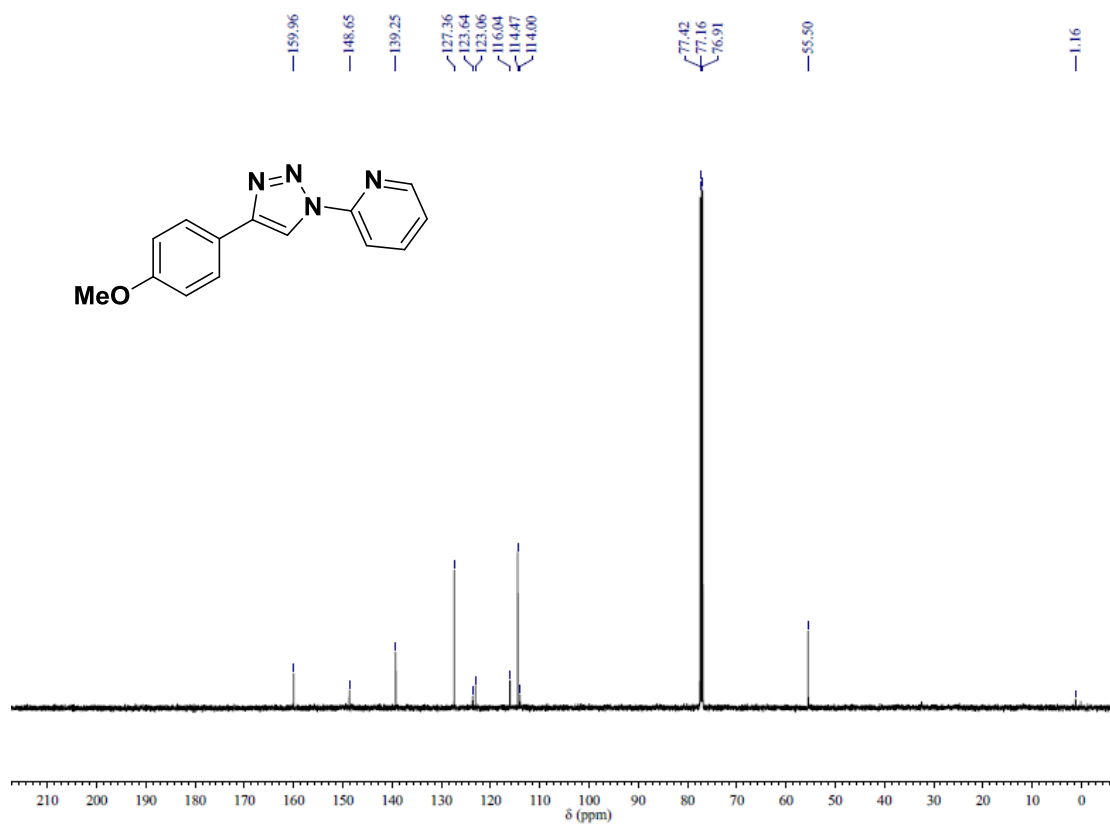

Compound 3e.

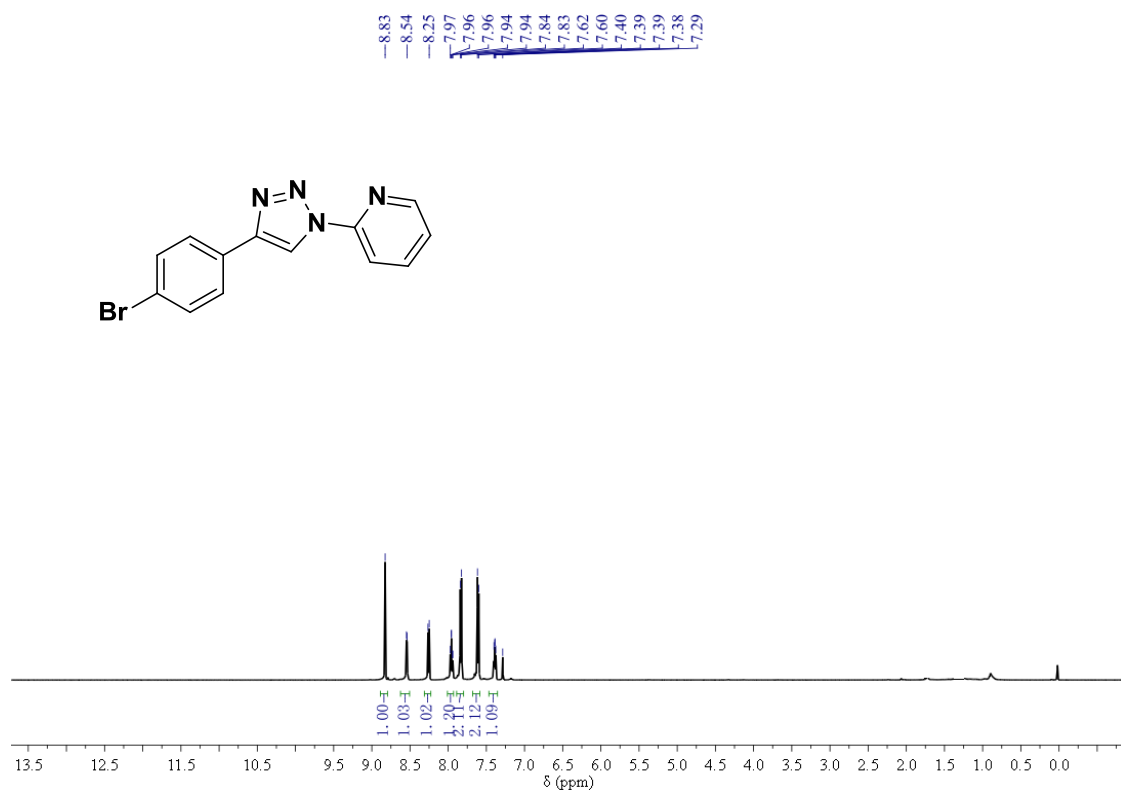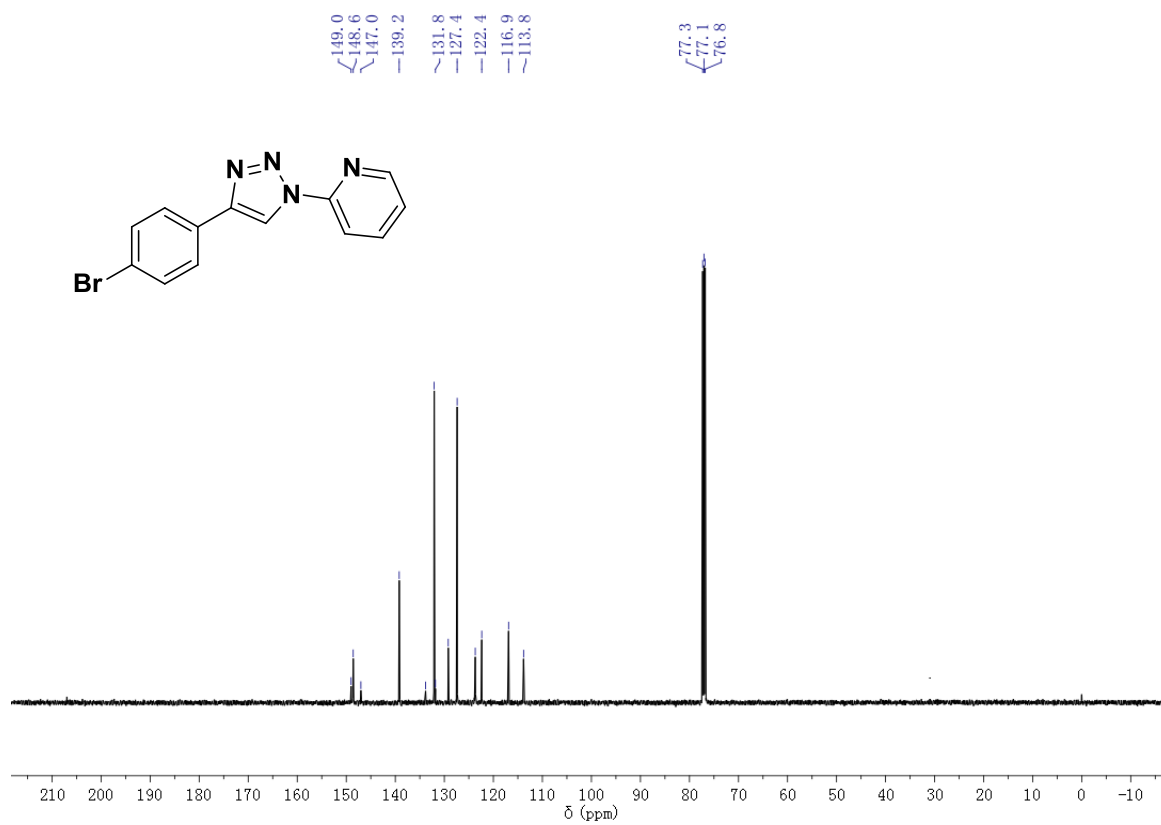

Compound 3f.

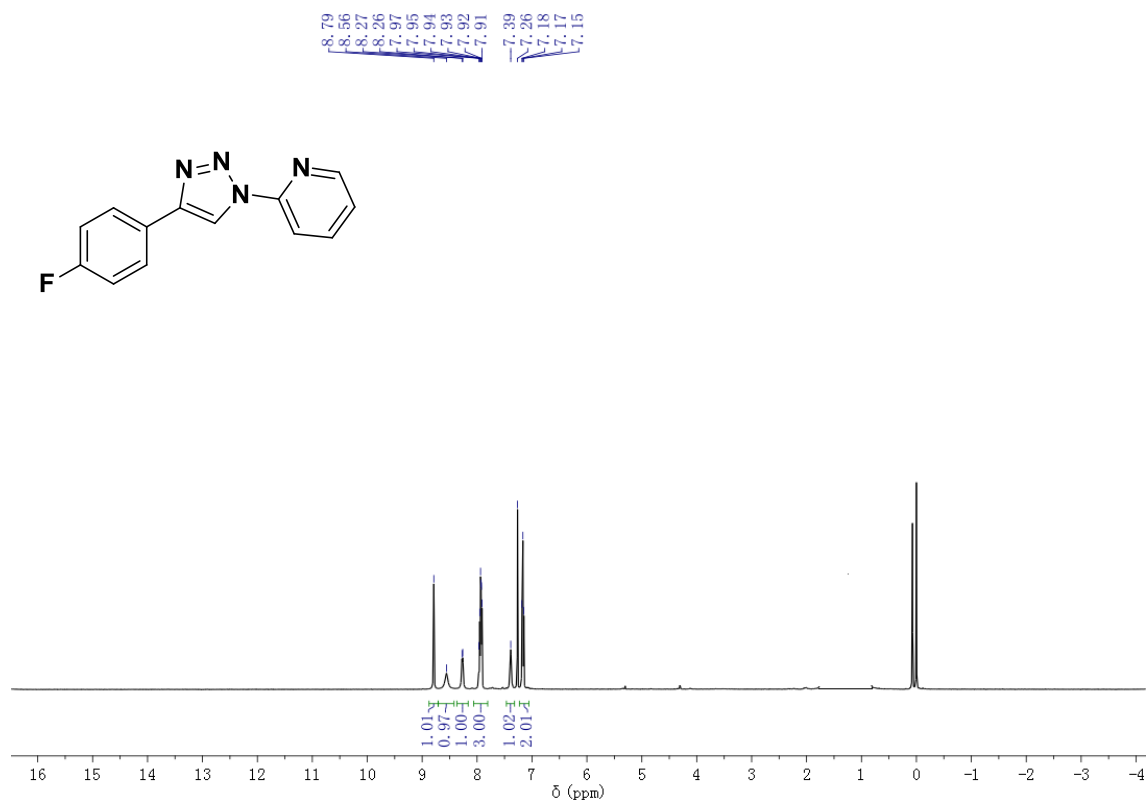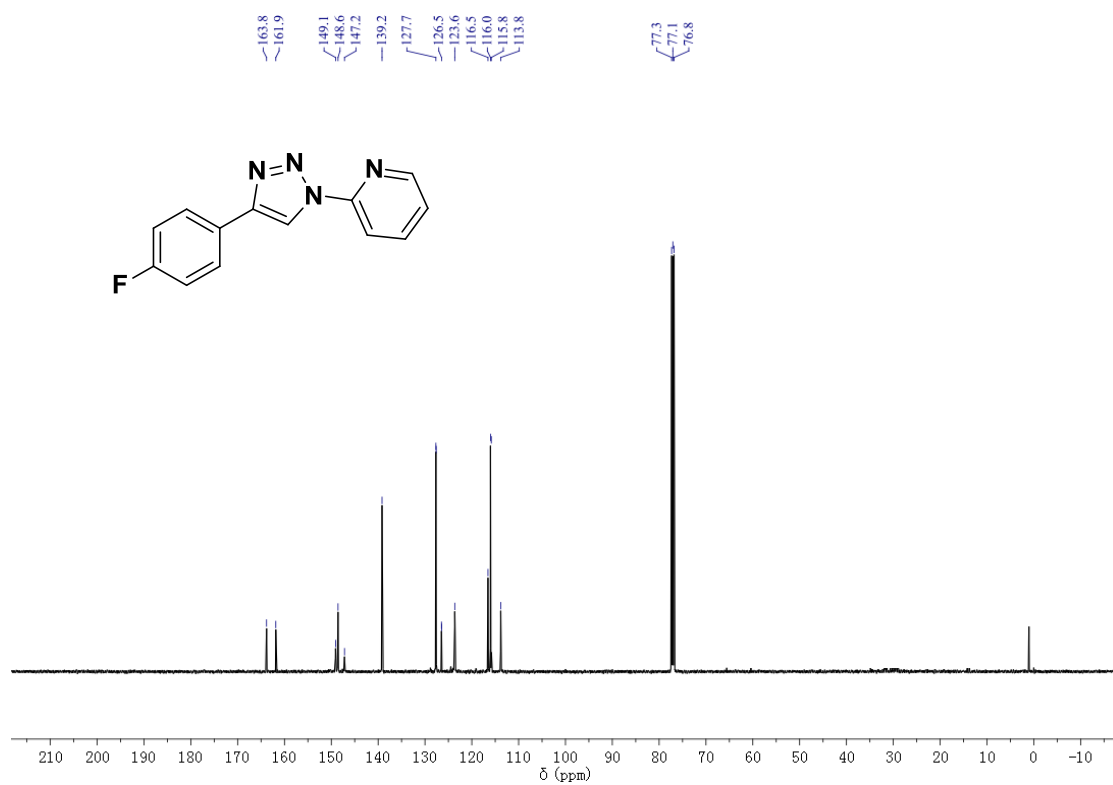

Compound 3g.

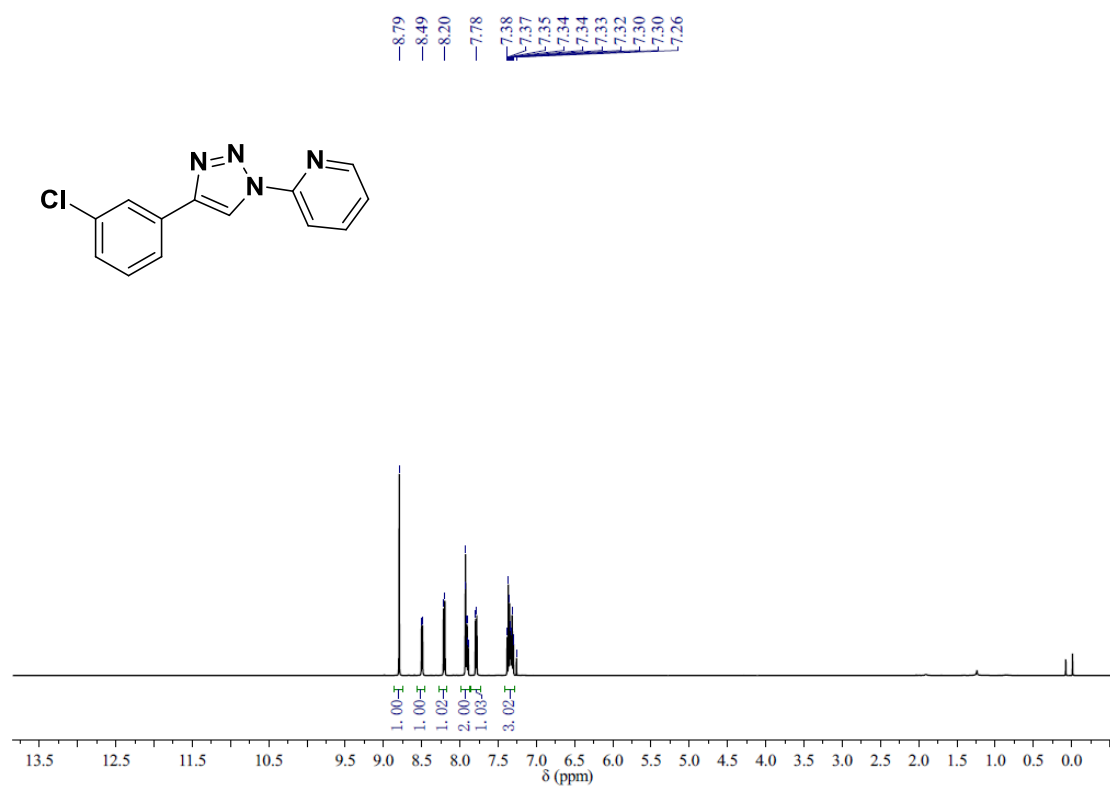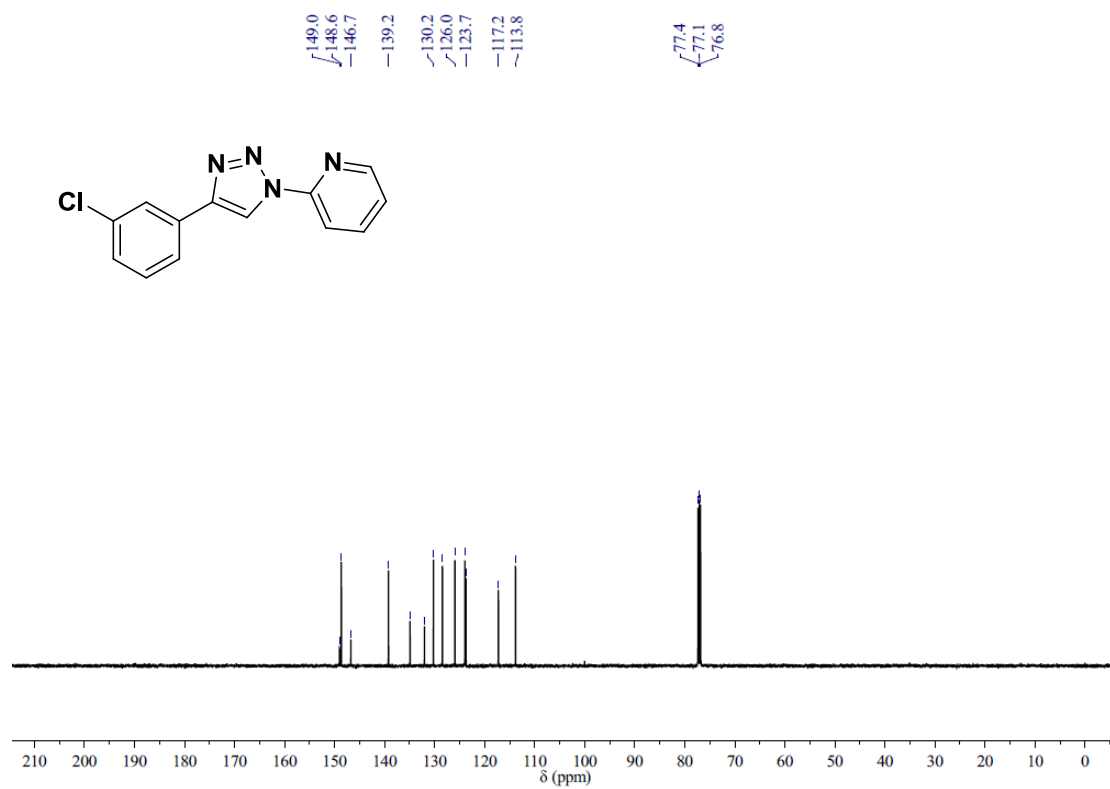



Compound 3h.

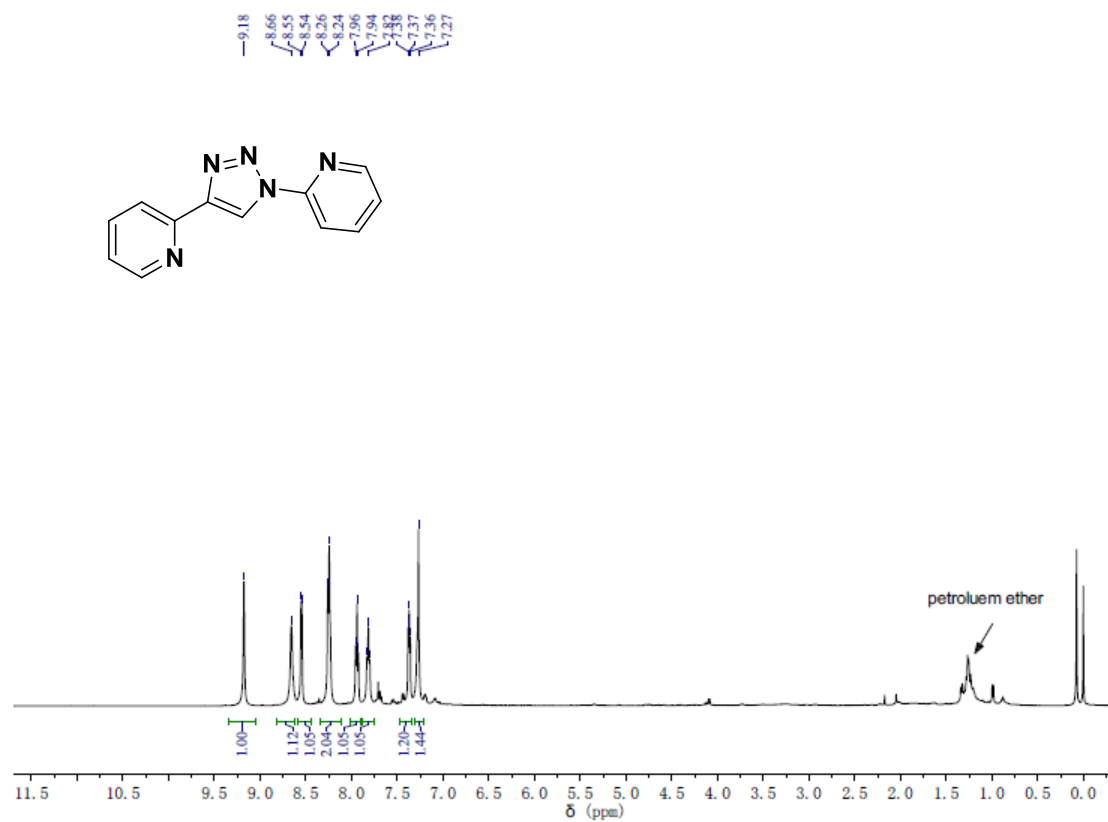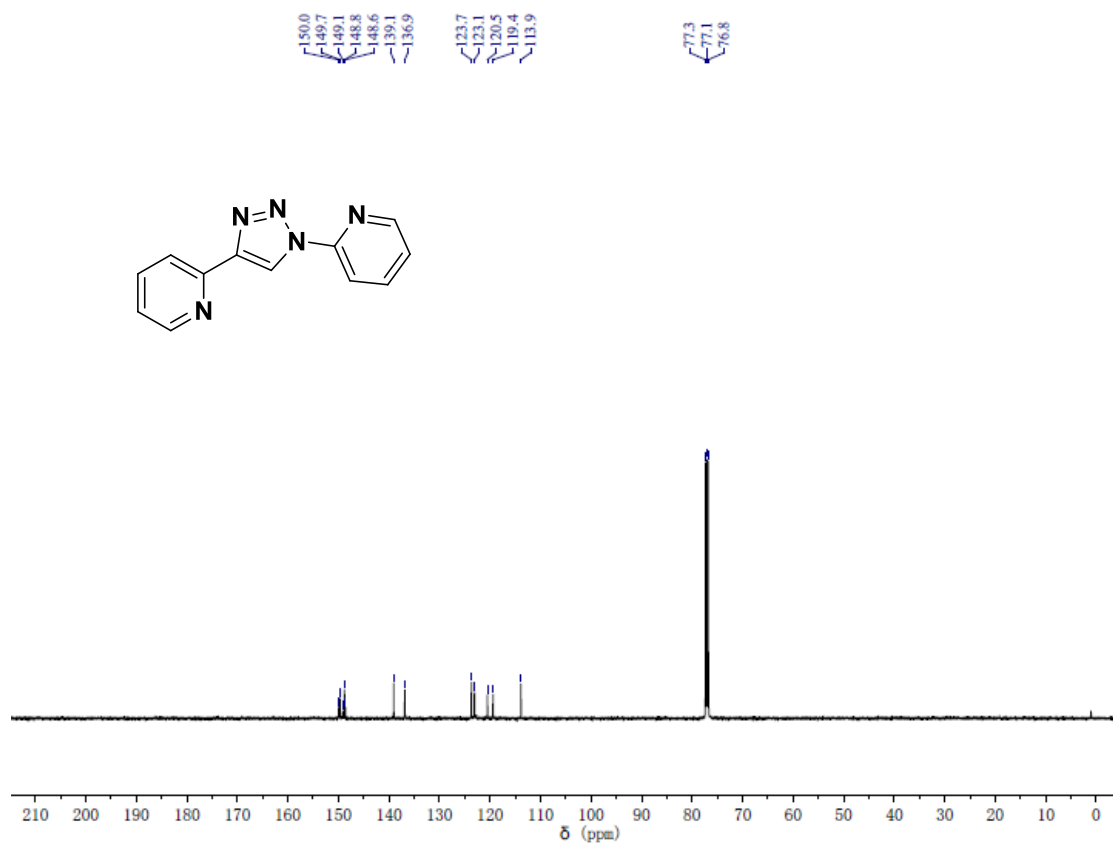

Compound 3i.

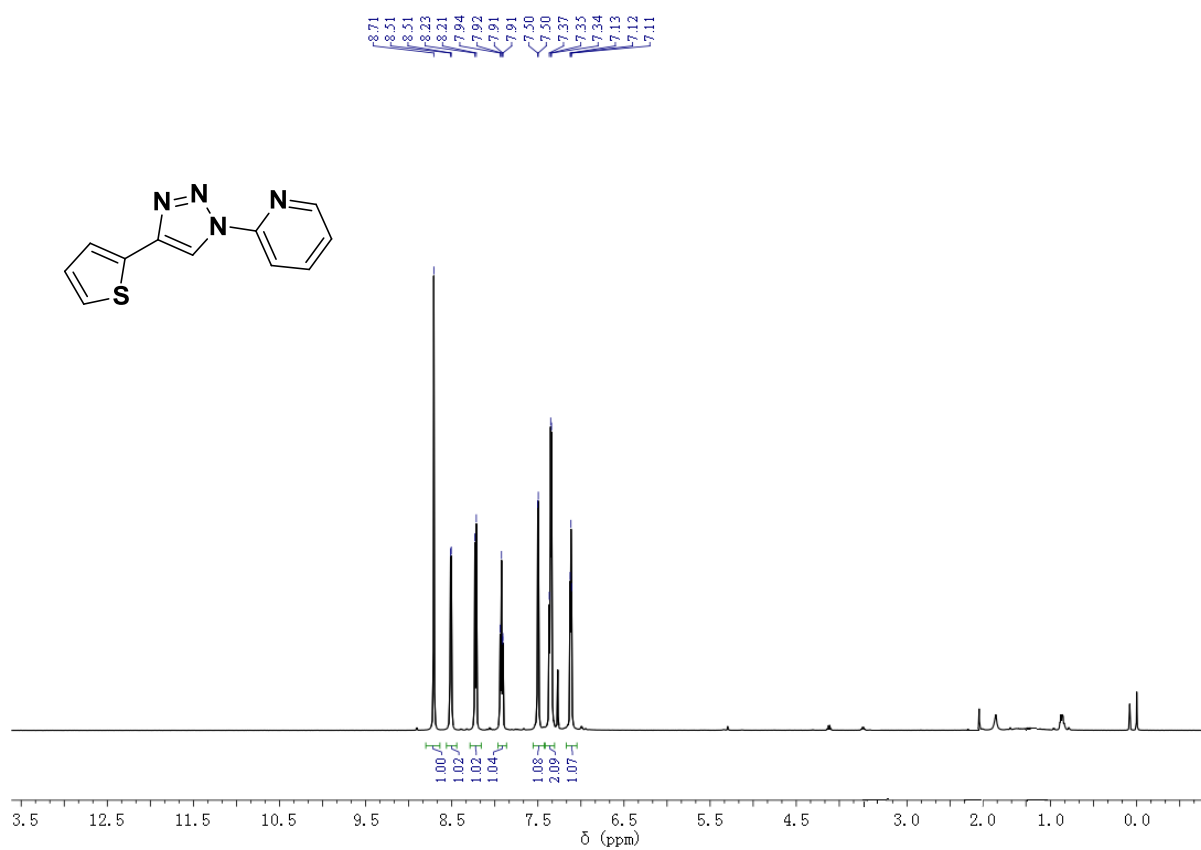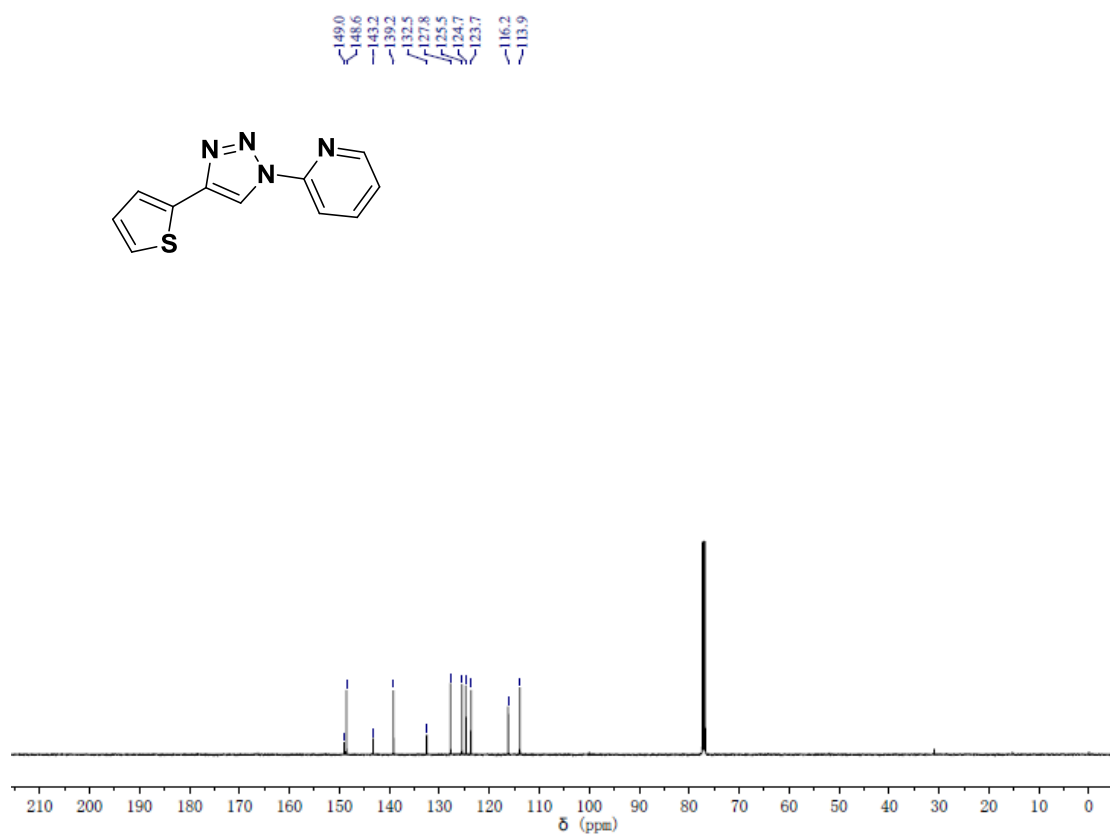

Compound 3j.

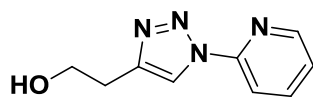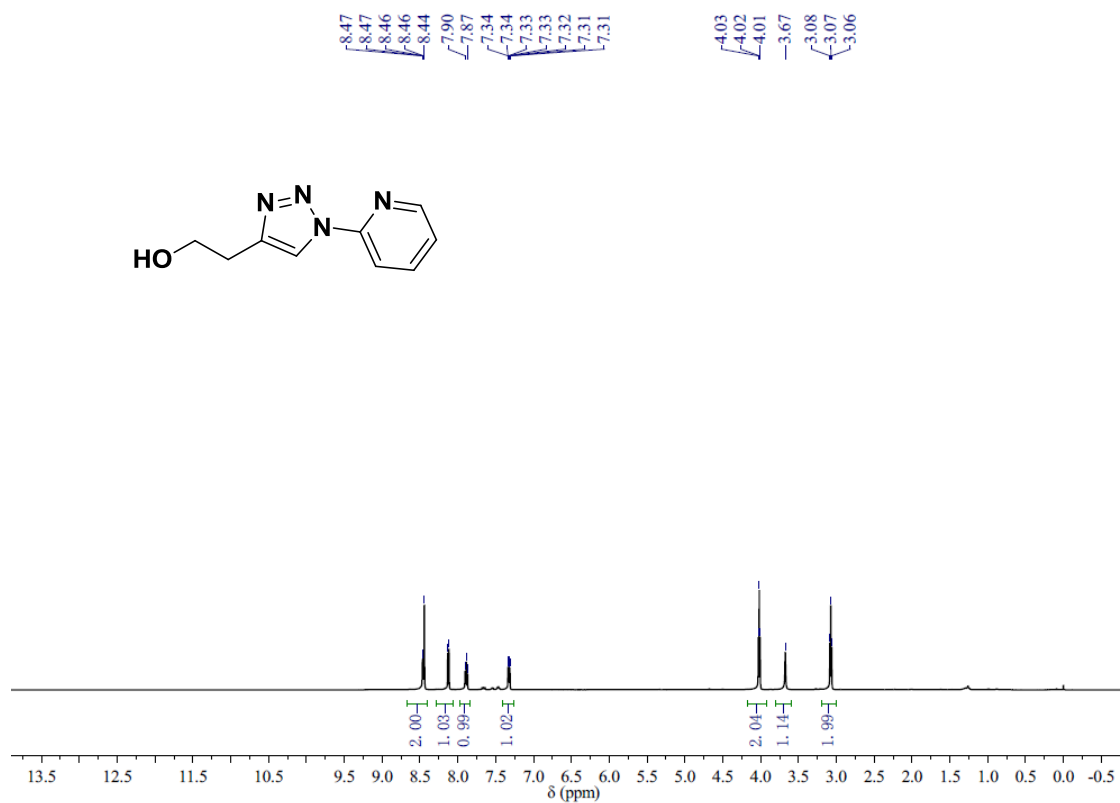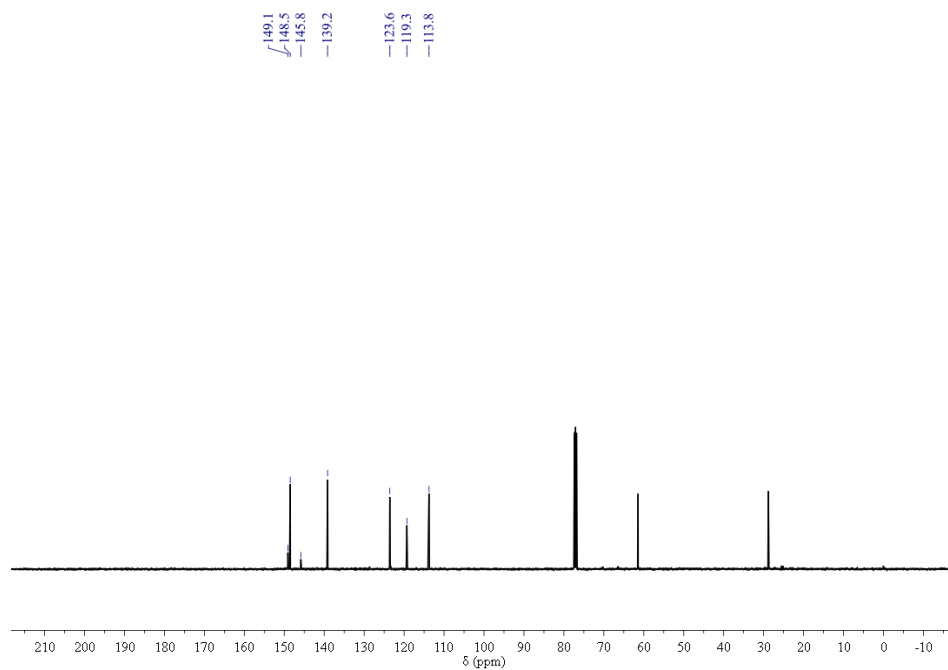

Compound 3k.

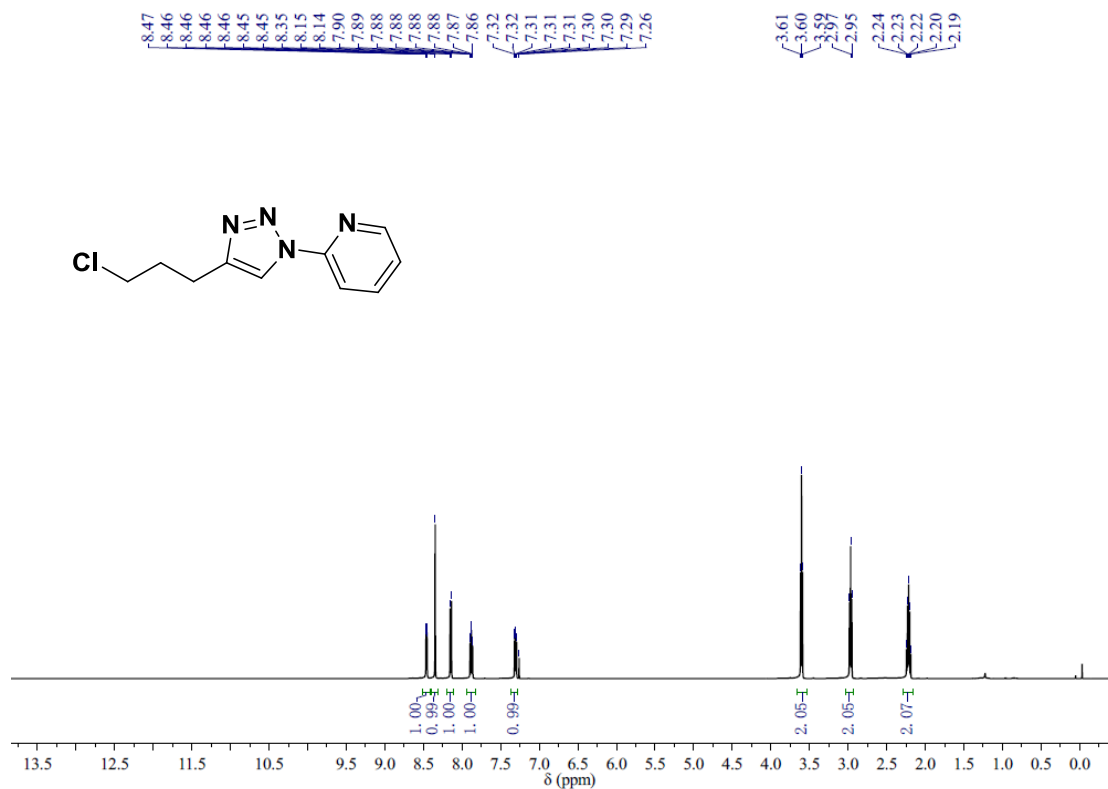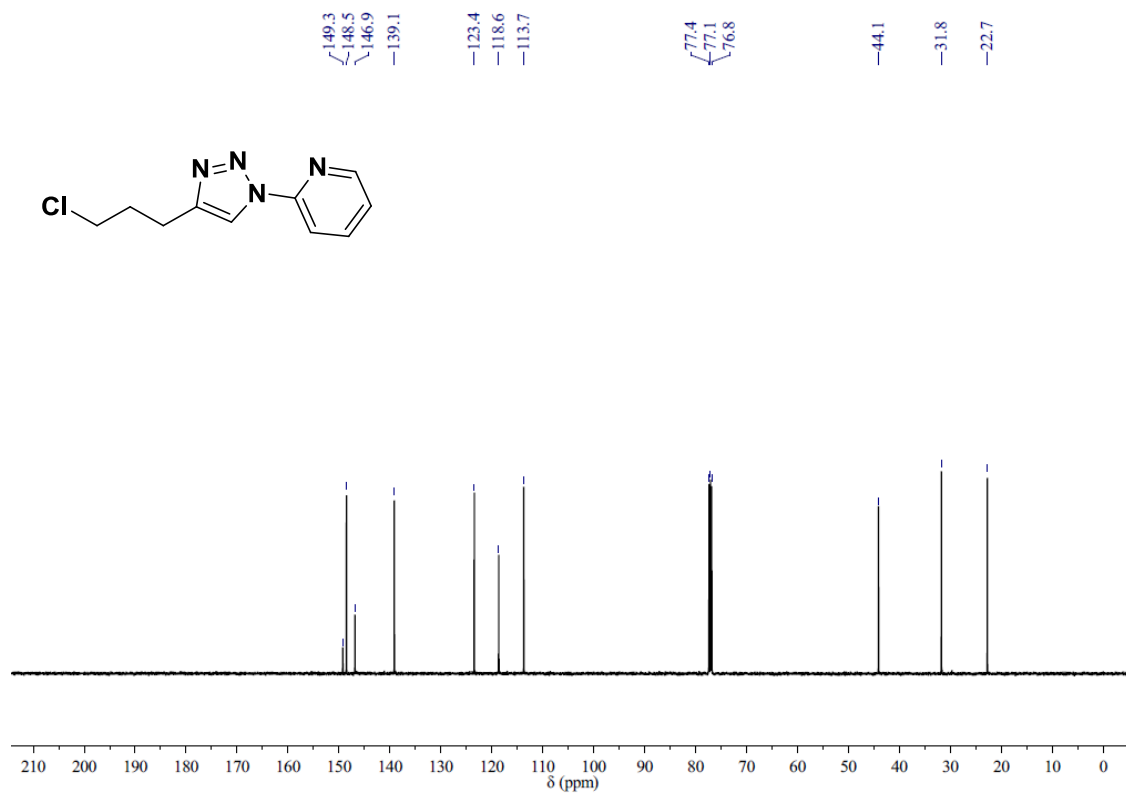

Compound 3l.

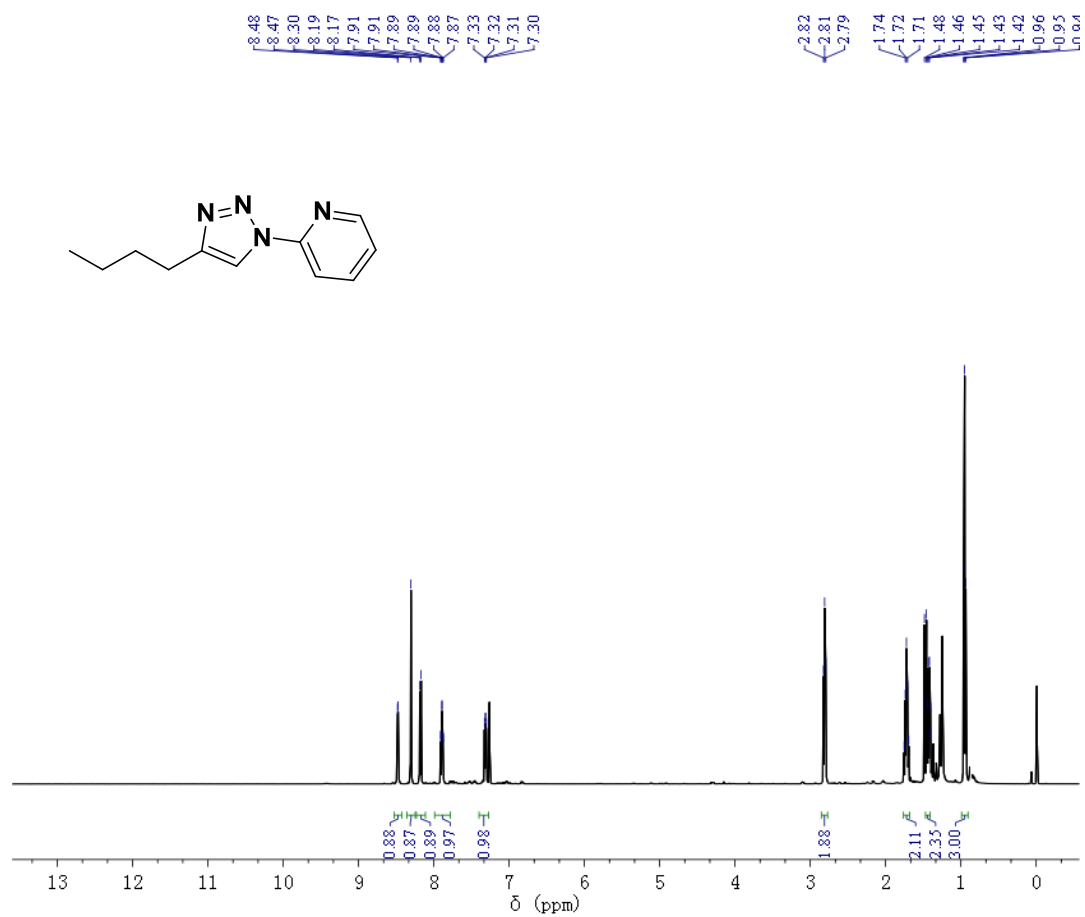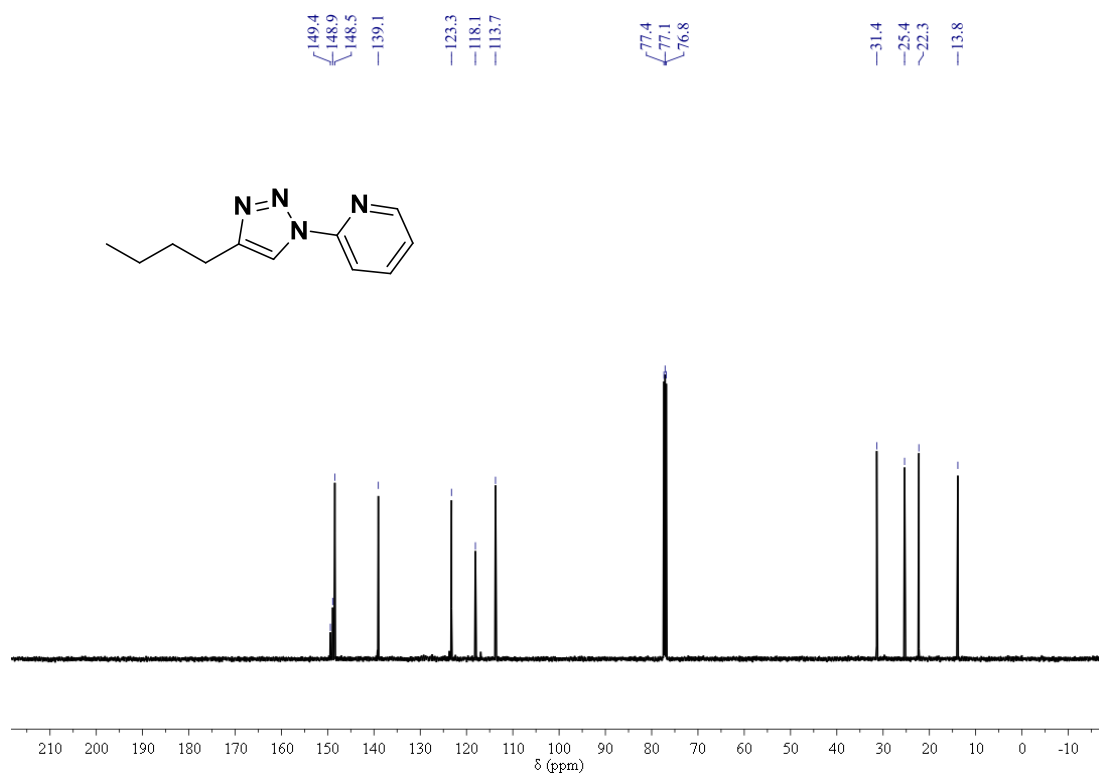

Compound 3m.

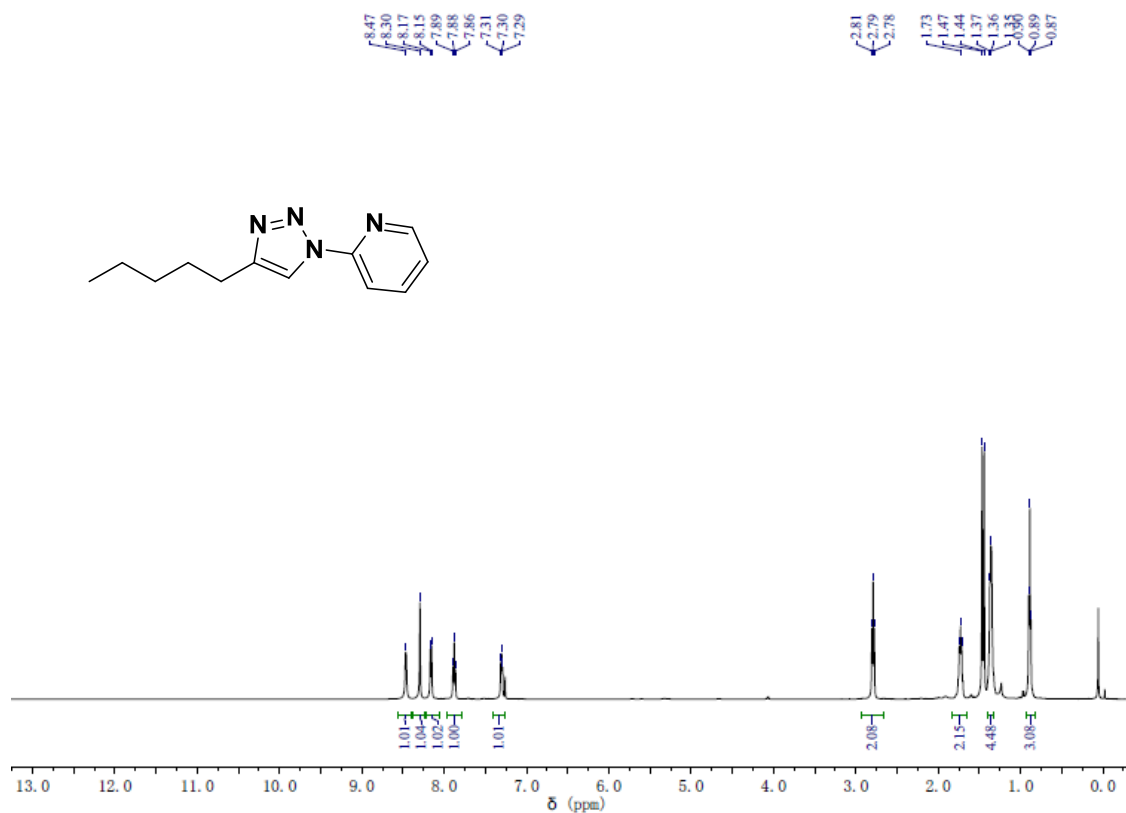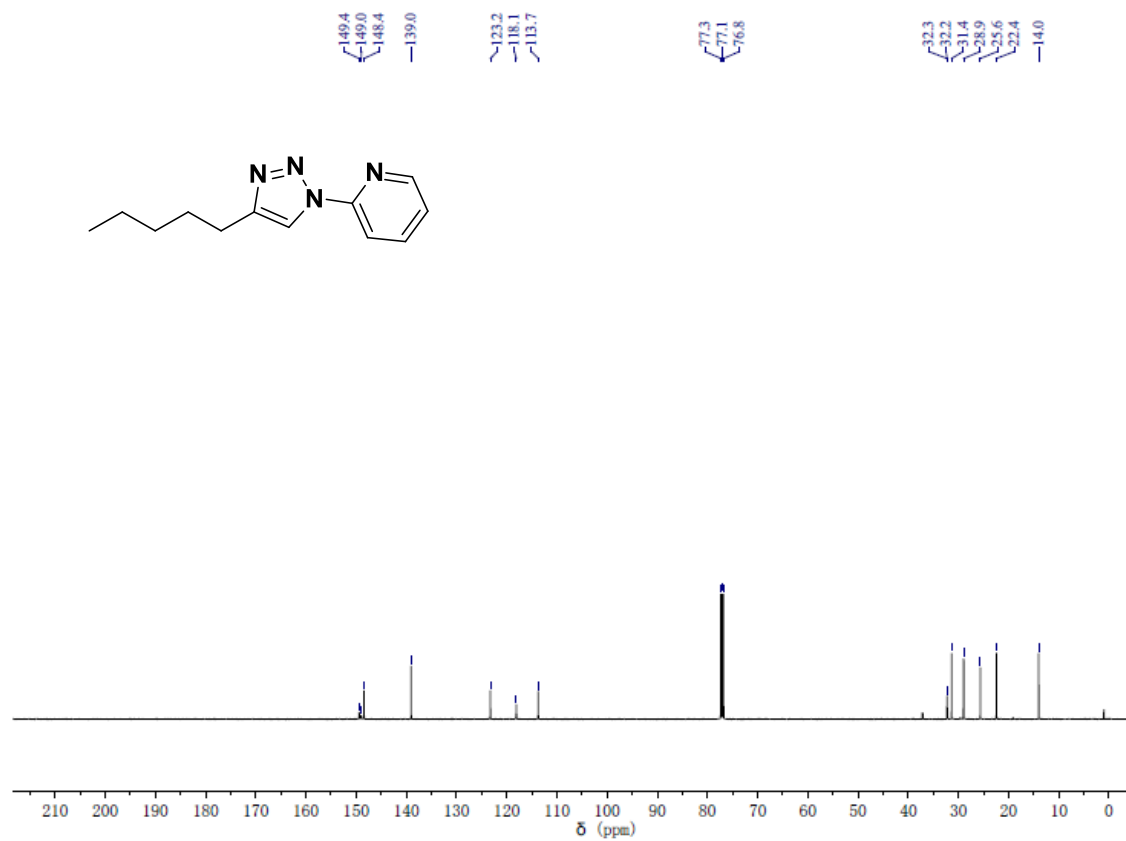

Compound 3n.

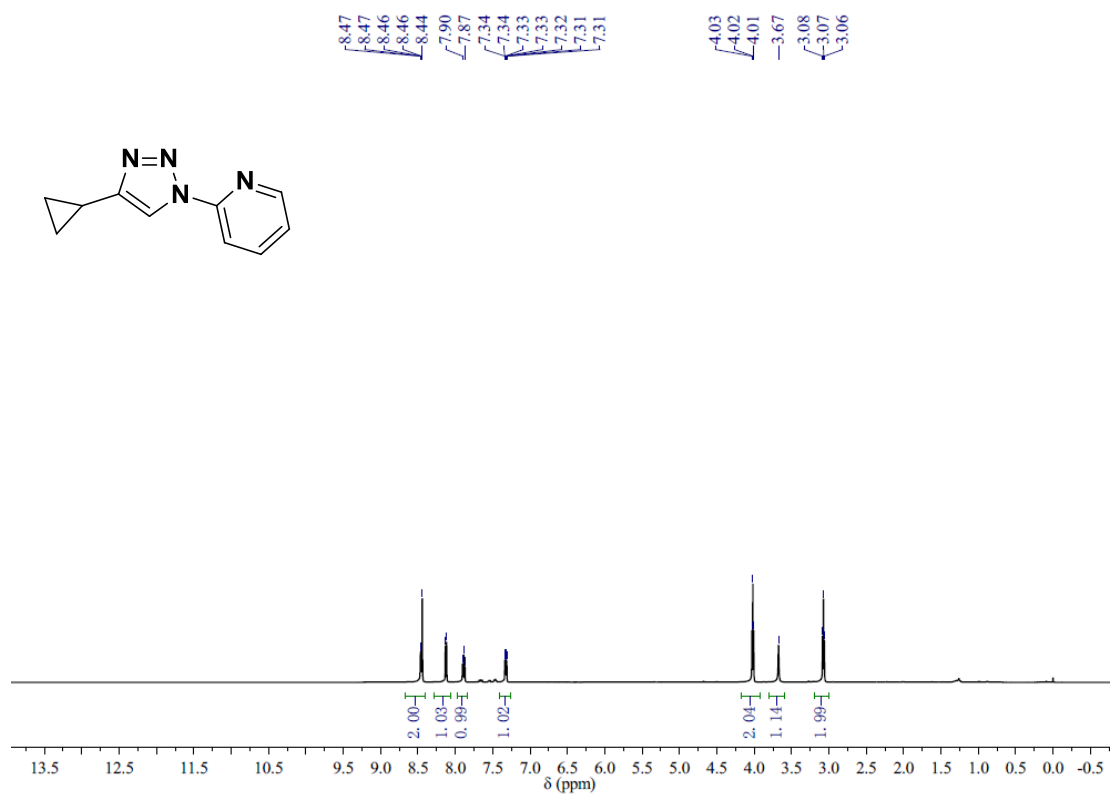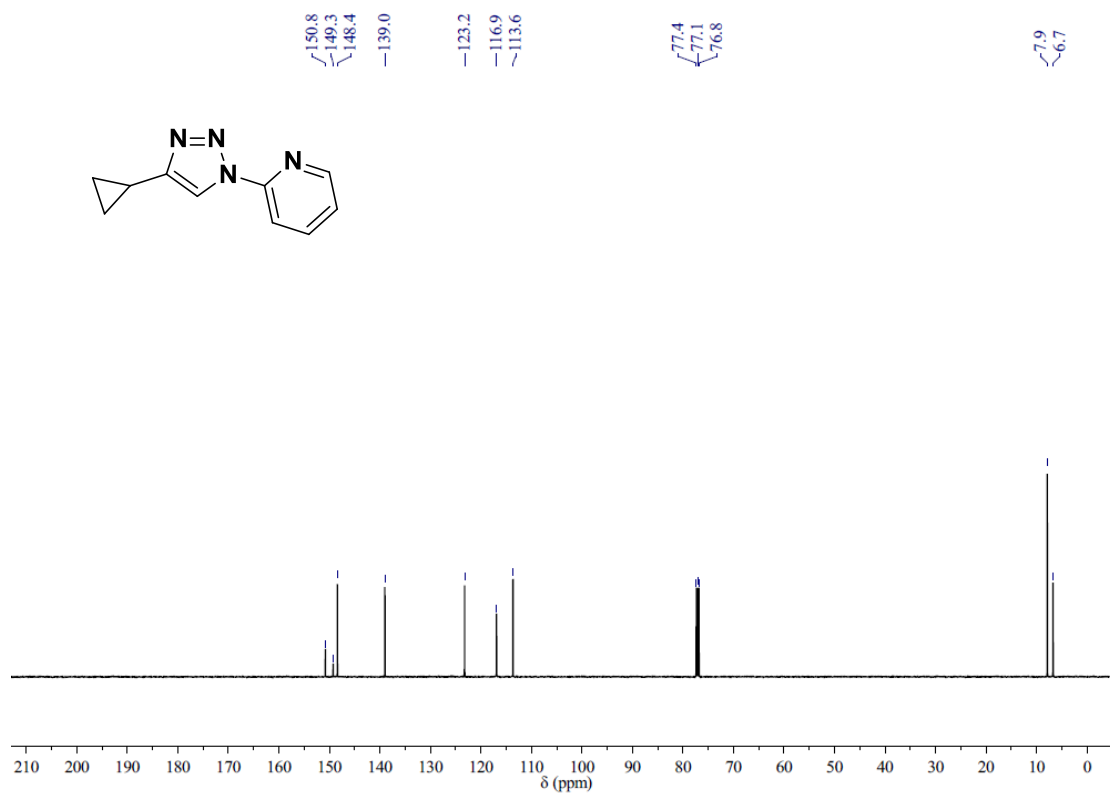

Compound 30.

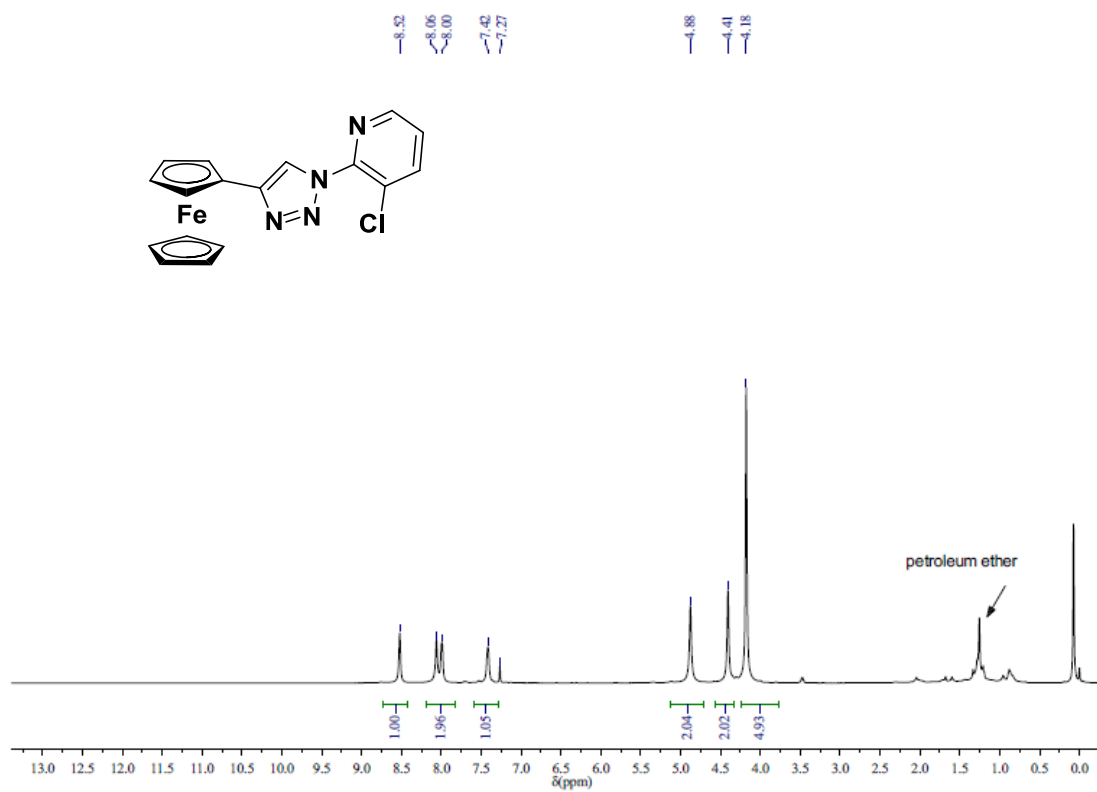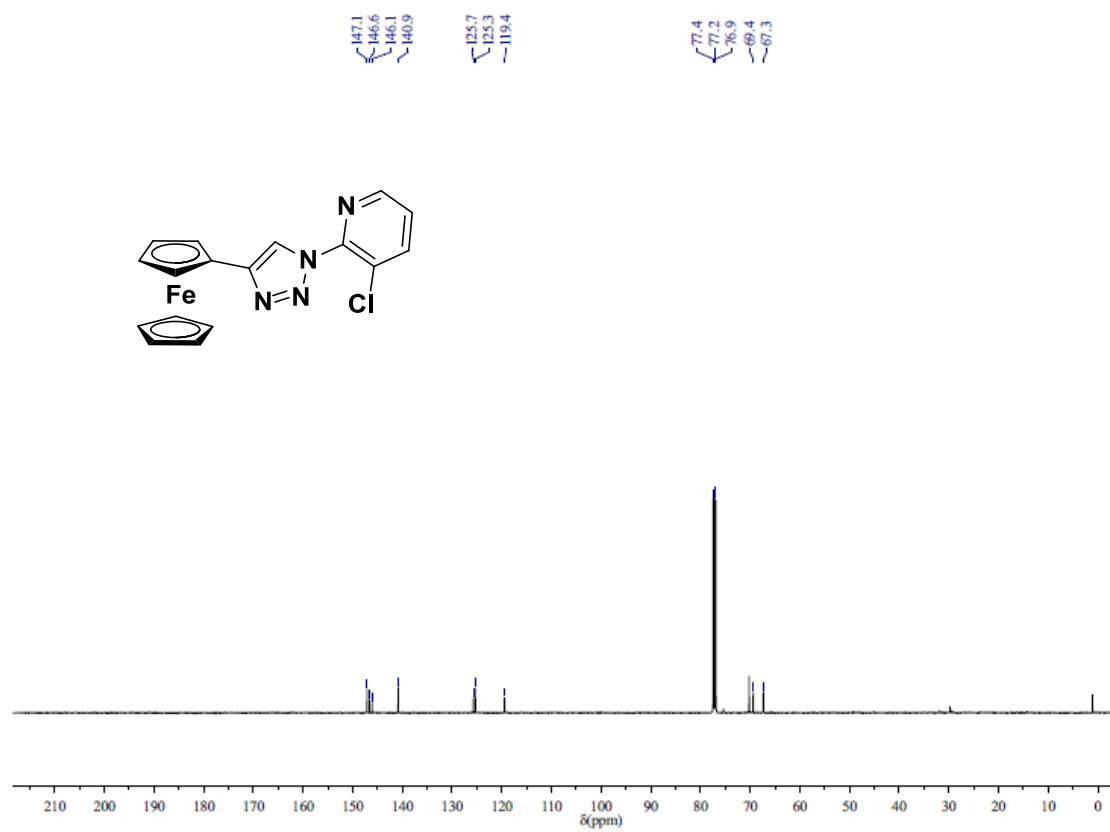



Compound 3p.

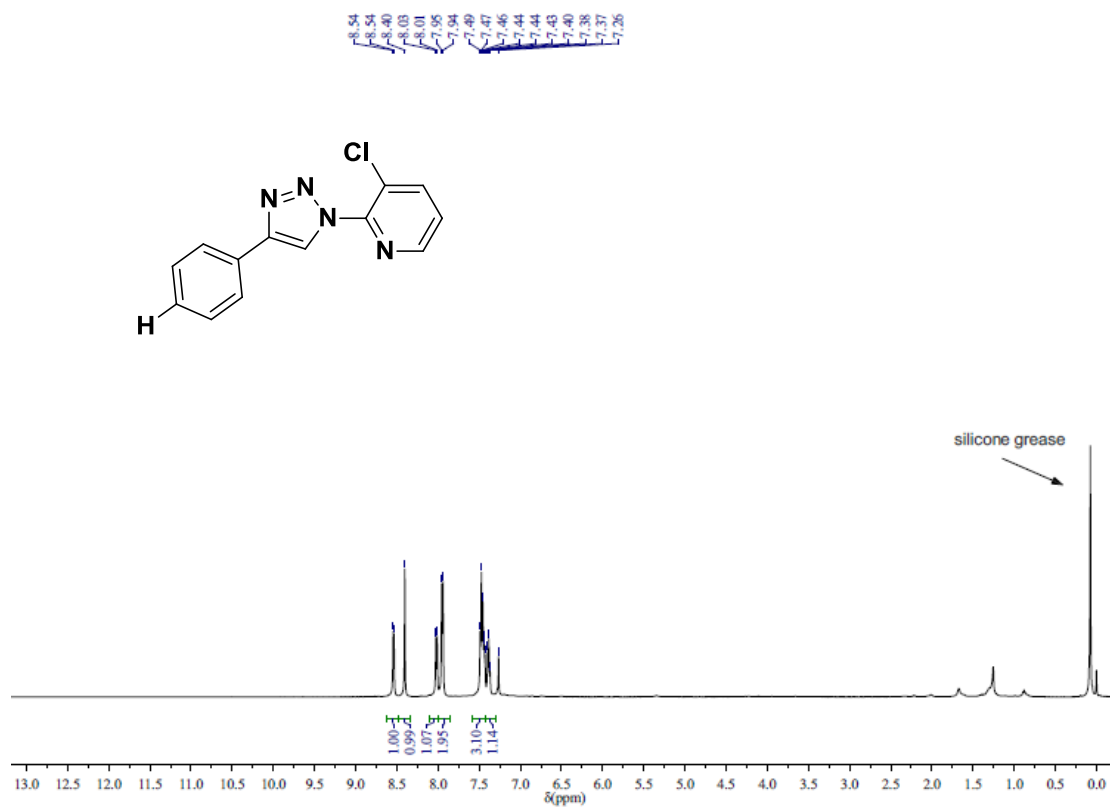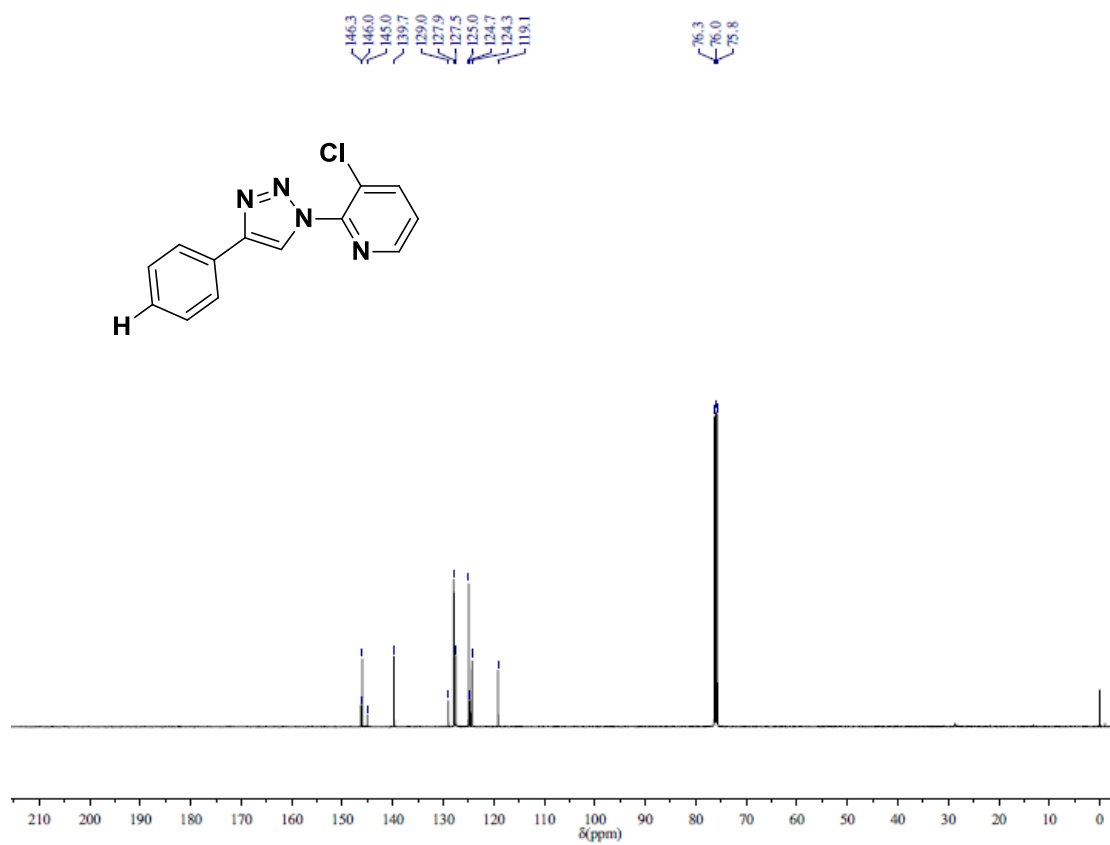

### Crystal data for compound 3a.

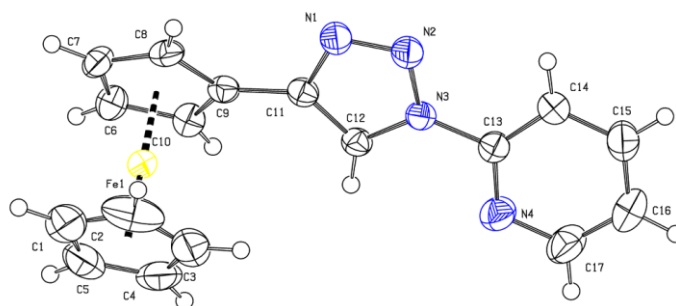

**FIGURE S1.** Molecular structure of compound **3a**.

ORTEP (50% ellipsoids) diagrams of  $[C_{17}H_{14}FeN_4]$  Selected distances (Å):

$[C(9)-C(11)$  1.459(3),  $C(11)-N(1)$  1.369(3),  $N(1)-N(2)$  1.309(3),  $N(3)-N(2)$  1.357(2),  
 $N(3)-C(12)$  1.357(2),  $N(3)-C(13)$  1.427(3)].

**Table 1.** Sample and crystal data for compound **3a**

|                                 |                                                                  |                           |
|---------------------------------|------------------------------------------------------------------|---------------------------|
| Identification code             | compound 3a                                                      |                           |
| Chemical formula                | $C_{17}H_{14}FeN_4$                                              |                           |
| Formula weight                  | 331.18                                                           |                           |
| Temperature                     | 296(2) K                                                         |                           |
| Wavelength                      | 0.71073 Å                                                        |                           |
| Crystal system                  | monoclinic                                                       |                           |
| Space group                     | P 1 21/n 1                                                       |                           |
| Unit cell dimensions            | $a = 5.8931(13)$ Å                                               | $\alpha = 90^\circ$       |
|                                 | $b = 20.199(4)$ Å                                                | $\beta = 92.215(4)^\circ$ |
|                                 | $c = 11.950(3)$ Å                                                | $\gamma = 90^\circ$       |
| Volume                          | 1421.4(5) Å <sup>3</sup>                                         |                           |
| Z                               | 4                                                                |                           |
| Density (calculated)            | 1.548 g/cm <sup>3</sup>                                          |                           |
| Absorption coefficient          | 1.062 mm <sup>-1</sup>                                           |                           |
| F(000)                          | 684                                                              |                           |
| Theta range for data collection | 1.98 to 28.28 °                                                  |                           |
| Index ranges                    | $-7 \leq h \leq 7$ , $-26 \leq k \leq 26$ , $-15 \leq l \leq 15$ |                           |
| Reflections collected           | 19469                                                            |                           |
| Independent reflections         | 3511 [R(int) = 0.0321]                                           |                           |
| Absorption correction           | multi-scan                                                       |                           |
| Structure solution technique    | direct methods                                                   |                           |
| Structure solution program      | SHELXS-97 (Sheldrick, 2008)                                      |                           |
| Refinement method               | Full-matrix least-squares on F <sup>2</sup>                      |                           |

|                                |                                                                                   |
|--------------------------------|-----------------------------------------------------------------------------------|
| Refinement program             | SHELXL-97 (Sheldrick, 2008)                                                       |
| Function minimized             | $\Sigma w(F_o - F_c)^2$                                                           |
| Data / restraints / parameters | 3511 / 1 / 199                                                                    |
| Goodness-of-fit on F2          | 1.034                                                                             |
| $\Delta/\sigma_{max}$          | 0.002                                                                             |
| Final R indices                | 2959 data; $I > 2\sigma(I)$<br>R1 = 0.0344, wR2 = 0.0848                          |
| all data                       | R1 = 0.0436, wR2 = 0.0897                                                         |
| Weighting scheme               | $w = 1/[\sigma^2(F_o) + (0.0438P)^2 + 0.6794P]$<br>where $P = (F_o^2 + 2F_c^2)/3$ |
| Largest diff. peak and hole    | 0.381 and -0.272 e $\text{\AA}^{-3}$                                              |
| R.M.S. deviation from mean     | 0.054 e $\text{\AA}^{-3}$                                                         |

**Table 2** Selected bond lengths ( $\text{\AA}$ ) and angles ( $^\circ$ ) for compound **3a**

|                  |            |                  |            |
|------------------|------------|------------------|------------|
| Fe(1)-C(1)       | 2.043(3)   | Fe(1)-C(2)       | 2.031(3)   |
| Fe(1)-C(3)       | 2.032(3)   | Fe(1)-C(4)       | 2.035(3)   |
| Fe(1)-C(5)       | 2.033(3)   | Fe(1)-C(6)       | 2.042(2)   |
| Fe(1)-C(7)       | 2.049(2)   | Fe(1)-C(8)       | 2.053(2)   |
| Fe(1)-C(9)       | 2.052(2)   | Fe(1)-C(10)      | 2.046(2)   |
| C(11)-N(1)       | 1.369(3)   | N(1)-N(2)        | 1.309(3)   |
| N(3)-N(2)        | 1.357(2)   | N(3)-C(12)       | 1.357(3)   |
| N(3)-C(13)       | 1.427(3)   | C(13)-N(4)       | 1.320(3)   |
| N(4)-C(17)       | 1.345(3)   | C(11)-C(9)       | 1.459(3)   |
| C(2)-Fe(1)-C(1)  | 40.73(13)  | C(3)-Fe(1)-C(1)  | 67.88(12)  |
| C(4)-Fe(1)-C(1)  | 66.93(12)  | C(5)-Fe(1)-C(1)  | 39.54(12)  |
| C(6)-Fe(1)-C(1)  | 121.72(12) | C(1)-Fe(1)-C(7)  | 108.98(11) |
| C(1)-Fe(1)-C(8)  | 126.20(11) | C(1)-Fe(1)-C(9)  | 162.49(12) |
| C(1)-Fe(1)-C(10) | 155.87(12) | C(2)-Fe(1)-C(3)  | 40.80(14)  |
| C(2)-Fe(1)-C(4)  | 67.73(13)  | C(2)-Fe(1)-C(5)  | 67.37(12)  |
| C(2)-Fe(1)-C(6)  | 158.41(14) | C(2)-Fe(1)-C(7)  | 123.95(12) |
| C(2)-Fe(1)-C(8)  | 110.17(11) | C(2)-Fe(1)-C(9)  | 125.21(12) |
| C(2)-Fe(1)-C(10) | 160.53(13) | C(3)-Fe(1)-C(4)  | 39.96(13)  |
| C(3)-Fe(1)-C(5)  | 66.89(12)  | C(3)-Fe(1)-C(6)  | 158.27(13) |
| C(3)-Fe(1)-C(7)  | 160.19(14) | C(3)-Fe(1)-C(8)  | 124.55(12) |
| C(3)-Fe(1)-C(9)  | 108.28(10) | C(3)-Fe(1)-C(10) | 122.84(12) |
| C(5)-Fe(1)-C(4)  | 39.43(12)  | C(4)-Fe(1)-C(6)  | 122.16(12) |
| C(4)-Fe(1)-C(7)  | 158.60(12) | C(4)-Fe(1)-C(8)  | 158.90(11) |
| C(4)-Fe(1)-C(9)  | 121.92(10) | C(4)-Fe(1)-C(10) | 106.31(11) |
| C(5)-Fe(1)-C(6)  | 107.06(11) | C(5)-Fe(1)-C(7)  | 124.04(11) |
| C(5)-Fe(1)-C(8)  | 160.98(11) | C(5)-Fe(1)-C(9)  | 156.38(11) |

|                  |            |                  |            |
|------------------|------------|------------------|------------|
| C(5)-Fe(1)-C(10) | 120.62(11) | C(6)-Fe(1)-C(7)  | 40.47(9)   |
| C(6)-Fe(1)-C(8)  | 67.87(9)   | C(6)-Fe(1)-C(9)  | 68.38(9)   |
| C(6)-Fe(1)-C(10) | 40.57(9)   | C(7)-Fe(1)-C(8)  | 40.32(9)   |
| C(7)-Fe(1)-C(9)  | 68.47(9)   | C(10)-Fe(1)-C(7) | 68.36(9)   |
| C(9)-Fe(1)-C(8)  | 40.75(8)   | C(10)-Fe(1)-C(8) | 68.31(9)   |
| C(10)-Fe(1)-C(9) | 40.84(8)   | C(12)-C(11)-N(1) | 108.13(19) |

**Table 3.** Atomic coordinates and equivalent isotropic atomic displacement parameters ( $\text{\AA}^2$ ) for compound **3a**

| x/a | y/b        | z/c          | U(eq)       |             |
|-----|------------|--------------|-------------|-------------|
| Fe1 | 0.60764(4) | 0.819163(13) | 0.89503(2)  | 0.02902(10) |
| N1  | 0.1668(3)  | 0.65836(9)   | 0.92115(15) | 0.0380(4)   |
| N2  | 0.1455(3)  | 0.60866(9)   | 0.99021(15) | 0.0383(4)   |
| N3  | 0.3562(3)  | 0.59507(8)   | 0.03411(13) | 0.0296(3)   |
| C15 | 0.3880(3)  | 0.54418(9)   | 0.11584(15) | 0.0309(4)   |
| C1  | 0.8522(5)  | 0.82542(13)  | 0.0197(2)   | 0.0576(7)   |
| C2  | 0.8574(5)  | 0.88096(13)  | 0.9534(2)   | 0.0563(6)   |
| C3  | 0.6513(5)  | 0.91311(13)  | 0.9552(2)   | 0.0631(7)   |
| C4  | 0.5087(5)  | 0.87590(17)  | 0.0247(2)   | 0.0712(8)   |
| C5  | 0.6385(6)  | 0.82123(15)  | 0.0650(2)   | 0.0672(9)   |
| C6  | 0.4627(4)  | 0.82389(10)  | 0.73646(17) | 0.0376(4)   |
| C7  | 0.6815(4)  | 0.79487(11)  | 0.73453(17) | 0.0374(4)   |
| C8  | 0.6843(3)  | 0.73734(10)  | 0.80281(16) | 0.0333(4)   |
| C9  | 0.4643(3)  | 0.73045(9)   | 0.84788(15) | 0.0294(4)   |
| C10 | 0.3899(3)  | 0.67711(9)   | 0.92021(15) | 0.0292(4)   |
| C11 | 0.2114(4)  | 0.50201(10)  | 0.13935(18) | 0.0400(5)   |
| C12 | 0.2546(4)  | 0.45316(11)  | 0.2180(2)   | 0.0471(5)   |
| C13 | 0.4669(4)  | 0.44904(13)  | 0.2694(2)   | 0.0513(6)   |
| C14 | 0.6286(4)  | 0.49374(13)  | 0.2400(2)   | 0.0537(6)   |
| N4  | 0.5939(3)  | 0.54174(10)  | 0.16311(16) | 0.0454(4)   |
| C16 | 0.5120(3)  | 0.63705(9)   | 0.99253(16) | 0.0304(4)   |
| C17 | 0.3279(3)  | 0.78421(10)  | 0.80562(16) | 0.0339(4)   |

**Table 4.** Torsion angles ( $^\circ$ ) for compound **3a**

|                |             |               |           |               |            |
|----------------|-------------|---------------|-----------|---------------|------------|
| C10-N1-N2-N3   | -0.1(2)     | N1-N2-N3-C16  | 0.3(2)    | N1-N2-N3-C15  | 177.98(16) |
| N2-N3-C15-N4   | -171.17(18) | C16-N3-C15-N4 | 6.0(3)    | N2-N3-C15-C11 | 9.3(3)     |
| C16-N3-C15-C11 | -173.53(19) | C4-Fe1-C1-C2  | -81.0(2)  | C5-Fe1-C1-C2  | -119.3(2)  |
| C3-Fe1-C1-C2   | -36.70(18)  | C7-Fe1-C1-C2  | 77.33(19) | C8-Fe1-C1-C2  | 118.68(17) |

|               |             |               |             |               |             |
|---------------|-------------|---------------|-------------|---------------|-------------|
| C6-Fe1-C1-C2  | 46.5(3)     | C9-Fe1-C1-C2  | 160.39(15)  | C17-Fe1-C1-C2 | -169.4(2)   |
| C4-Fe1-C1-C5  | 38.22(18)   | C2-Fe1-C1-C5  | 119.3(2)    | C3-Fe1-C1-C5  | 82.57(19)   |
| C7-Fe1-C1-C5  | -163.41(16) | C8-Fe1-C1-C5  | -122.05(17) | C6-Fe1-C1-C5  | 165.8(2)    |
| C9-Fe1-C1-C5  | -80.34(19)  | C17-Fe1-C1-C5 | -50.1(3)    | C5-C1-C2-C3   | 0.2(3)      |
| Fe1-C1-C2-C3  | 59.88(18)   | C5-C1-C2-Fe1  | -59.65(18)  | C4-Fe1-C2-C1  | 82.0(2)     |
| C5-Fe1-C2-C1  | 37.56(18)   | C3-Fe1-C2-C1  | 120.3(3)    | C7-Fe1-C2-C1  | -120.21(17) |
| C8-Fe1-C2-C1  | -78.06(19)  | C6-Fe1-C2-C1  | -161.38(16) | C9-Fe1-C2-C1  | -45.3(3)    |
| C17-Fe1-C2-C1 | 168.3(3)    | C4-Fe1-C2-C3  | -38.27(19)  | C5-Fe1-C2-C3  | -82.7(2)    |
| C1-Fe1-C2-C3  | -120.3(3)   | C7-Fe1-C2-C3  | 119.52(17)  | C8-Fe1-C2-C3  | 161.68(16)  |
| C6-Fe1-C2-C3  | 78.4(2)     | C9-Fe1-C2-C3  | -165.6(2)   | C17-Fe1-C2-C3 | 48.0(4)     |
| C1-C2-C3-C4   | -0.6(3)     | Fe1-C2-C3-C4  | 59.16(17)   | C1-C2-C3-Fe1  | -59.76(18)  |
| C4-Fe1-C3-C2  | 118.9(2)    | C5-Fe1-C3-C2  | 80.12(19)   | C1-Fe1-C3-C2  | 36.63(17)   |
| C7-Fe1-C3-C2  | -77.96(19)  | C8-Fe1-C3-C2  | -41.5(3)    | C6-Fe1-C3-C2  | -120.84(17) |
| C9-Fe1-C3-C2  | 160.6(3)    | C17-Fe1-C3-C2 | -162.53(15) | C2-Fe1-C3-C4  | -118.9(2)   |
| C5-Fe1-C3-C4  | -38.74(18)  | C1-Fe1-C3-C4  | -82.23(19)  | C7-Fe1-C3-C4  | 163.18(16)  |
| C8-Fe1-C3-C4  | -160.3(2)   | C6-Fe1-C3-C4  | 120.30(18)  | C9-Fe1-C3-C4  | 41.7(4)     |
| C17-Fe1-C3-C4 | 78.6(2)     | C2-C3-C4-C5   | 0.7(3)      | Fe1-C3-C4-C5  | 60.32(17)   |
| C2-C3-C4-Fe1  | -59.59(18)  | C2-Fe1-C4-C5  | -80.33(18)  | C1-Fe1-C4-C5  | -37.51(17)  |
| C3-Fe1-C4-C5  | -117.5(2)   | C7-Fe1-C4-C5  | -159.5(2)   | C8-Fe1-C4-C5  | 38.2(4)     |
| C6-Fe1-C4-C5  | 162.90(16)  | C9-Fe1-C4-C5  | 76.70(19)   | C17-Fe1-C4-C5 | 119.94(17)  |
| C2-Fe1-C4-C3  | 37.13(16)   | C5-Fe1-C4-C3  | 117.5(2)    | C1-Fe1-C4-C3  | 79.96(18)   |
| C7-Fe1-C4-C3  | -42.0(3)    | C8-Fe1-C4-C3  | 155.7(3)    | C6-Fe1-C4-C3  | -79.64(19)  |
| C9-Fe1-C4-C3  | -165.83(14) | C17-Fe1-C4-C3 | -122.60(16) | C2-C1-C5-C4   | 0.2(3)      |
| Fe1-C1-C5-C4  | -59.58(18)  | C2-C1-C5-Fe1  | 59.81(18)   | C3-C4-C5-C1   | -0.6(3)     |
| Fe1-C4-C5-C1  | 59.95(18)   | C3-C4-C5-Fe1  | -60.54(17)  | C4-Fe1-C5-C1  | -118.8(2)   |
| C2-Fe1-C5-C1  | -37.06(16)  | C3-Fe1-C5-C1  | -80.03(18)  | C7-Fe1-C5-C1  | 40.8(3)     |
| C8-Fe1-C5-C1  | 75.50(18)   | C6-Fe1-C5-C1  | -164.7(2)   | C9-Fe1-C5-C1  | 118.17(16)  |
| C17-Fe1-C5-C1 | 160.39(14)  | C2-Fe1-C5-C4  | 81.70(19)   | C1-Fe1-C5-C4  | 118.8(2)    |
| C3-Fe1-C5-C4  | 38.73(17)   | C7-Fe1-C5-C4  | 159.6(2)    | C8-Fe1-C5-C4  | -165.75(16) |
| C6-Fe1-C5-C4  | -45.9(4)    | C9-Fe1-C5-C4  | -123.07(17) | C17-Fe1-C5-C4 | -80.86(19)  |
| C4-Fe1-C6-C17 | -81.22(17)  | C2-Fe1-C6-C17 | -165.26(14) | C5-Fe1-C6-C17 | -46.8(3)    |
| C1-Fe1-C6-C17 | 161.0(2)    | C3-Fe1-C6-C17 | -124.02(14) | C7-Fe1-C6-C17 | 119.02(17)  |
| C8-Fe1-C6-C17 | 81.58(12)   | C9-Fe1-C6-C17 | 37.51(11)   | C4-Fe1-C6-C7  | 159.76(15)  |
| C2-Fe1-C6-C7  | 75.72(16)   | C5-Fe1-C6-C7  | -165.8(3)   | C1-Fe1-C6-C7  | 41.9(3)     |
| C3-Fe1-C6-C7  | 116.97(15)  | C8-Fe1-C6-C7  | -37.44(12)  | C9-Fe1-C6-C7  | -81.51(13)  |
| C17-Fe1-C6-C7 | -119.02(17) | C17-C6-C7-C8  | -0.3(2)     | Fe1-C6-C7-C8  | 59.35(14)   |
| C17-C6-C7-Fe1 | -59.67(14)  | C4-Fe1-C7-C6  | -51.3(3)    | C2-Fe1-C7-C6  | -122.83(14) |
| C5-Fe1-C7-C6  | 167.0(2)    | C1-Fe1-C7-C6  | -163.26(14) | C3-Fe1-C7-C6  | -82.21(16)  |
| C8-Fe1-C7-C6  | 119.73(17)  | C9-Fe1-C7-C6  | 81.77(13)   | C17-Fe1-C7-C6 | 37.67(12)   |
| C4-Fe1-C7-C8  | -171.0(2)   | C2-Fe1-C7-C8  | 117.44(14)  | C5-Fe1-C7-C8  | 47.3(3)     |
| C1-Fe1-C7-C8  | 77.01(15)   | C3-Fe1-C7-C8  | 158.06(14)  | C6-Fe1-C7-C8  | -119.73(17) |
| C9-Fe1-C7-C8  | -37.95(11)  | C17-Fe1-C7-C8 | -82.06(13)  | C6-C7-C8-C9   | 0.0(2)      |
| Fe1-C7-C8-C9  | 59.47(13)   | C6-C7-C8-Fe1  | -59.47(15)  | C4-Fe1-C8-C7  | 170.1(3)    |
| C2-Fe1-C8-C7  | -80.35(15)  | C5-Fe1-C8-C7  | -161.14(15) | C1-Fe1-C8-C7  | -120.72(15) |

|                |             |                 |             |                 |             |
|----------------|-------------|-----------------|-------------|-----------------|-------------|
| C3-Fe1-C8-C7   | -51.0(3)    | C6-Fe1-C8-C7    | 37.34(12)   | C9-Fe1-C8-C7    | 119.03(17)  |
| C17-Fe1-C8-C7  | 80.91(13)   | C4-Fe1-C8-C9    | 51.1(3)     | C2-Fe1-C8-C9    | 160.62(13)  |
| C5-Fe1-C8-C9   | 79.83(16)   | C1-Fe1-C8-C9    | 120.25(14)  | C3-Fe1-C8-C9    | -170.1(2)   |
| C7-Fe1-C8-C9   | -119.03(17) | C6-Fe1-C8-C9    | -81.69(12)  | C17-Fe1-C8-C9   | -38.12(11)  |
| C7-C8-C9-C17   | 0.3(2)      | Fe1-C8-C9-C17   | 59.68(13)   | C7-C8-C9-C10    | 178.25(18)  |
| Fe1-C8-C9-C10  | -122.40(19) | C7-C8-C9-Fe1    | -59.36(14)  | C4-Fe1-C9-C8    | -161.45(15) |
| C2-Fe1-C9-C8   | -45.4(3)    | C5-Fe1-C9-C8    | -119.42(15) | C1-Fe1-C9-C8    | -77.55(16)  |
| C3-Fe1-C9-C8   | 166.4(3)    | C7-Fe1-C9-C8    | 37.74(11)   | C6-Fe1-C9-C8    | 81.43(12)   |
| C17-Fe1-C9-C8  | 118.56(16)  | C4-Fe1-C9-C17   | 79.99(17)   | C2-Fe1-C9-C17   | -164.0(2)   |
| C5-Fe1-C9-C17  | 122.02(15)  | C1-Fe1-C9-C17   | 163.89(14)  | C3-Fe1-C9-C17   | 47.9(4)     |
| C7-Fe1-C9-C17  | -80.82(12)  | C8-Fe1-C9-C17   | -118.56(16) | C6-Fe1-C9-C17   | -37.13(12)  |
| C4-Fe1-C9-C10  | -40.8(2)    | C2-Fe1-C9-C10   | 75.2(3)     | C5-Fe1-C9-C10   | 1.2(2)      |
| C1-Fe1-C9-C10  | 43.1(2)     | C3-Fe1-C9-C10   | -72.9(4)    | C7-Fe1-C9-C10   | 158.37(19)  |
| C8-Fe1-C9-C10  | 120.6(2)    | C6-Fe1-C9-C10   | -157.93(19) | C17-Fe1-C9-C10  | -120.8(2)   |
| N2-N1-C10-C16  | -0.2(2)     | N2-N1-C10-C9    | 178.25(17)  | C8-C9-C10-C16   | 26.1(3)     |
| C17-C9-C10-C16 | -156.4(2)   | Fe1-C9-C10-C16  | -65.0(3)    | C8-C9-C10-N1    | -151.96(19) |
| C17-C9-C10-N1  | 25.6(3)     | Fe1-C9-C10-N1   | 117.03(18)  | N4-C15-C11-C12  | -0.5(3)     |
| N3-C15-C11-C12 | 178.95(19)  | C15-C11-C12-C13 | 0.7(3)      | C11-C12-C13-C14 | -0.3(4)     |
| C12-C13-C14-N4 | -0.3(4)     | C11-C15-N4-C14  | 0.0(3)      | N3-C15-N4-C14   | -179.5(2)   |
| C13-C14-N4-C15 | 0.5(4)      | N2-N3-C16-C10   | -0.4(2)     | C15-N3-C16-C10  | -177.80(17) |
| N1-C10-C16-N3  | 0.3(2)      | C9-C10-C16-N3   | -177.87(18) | C7-C6-C17-C9    | 0.5(2)      |
| Fe1-C6-C17-C9  | -58.83(13)  | C7-C6-C17-Fe1   | 59.35(14)   | C8-C9-C17-C6    | -0.5(2)     |
| C10-C9-C17-C6  | -178.45(18) | Fe1-C9-C17-C6   | 58.95(14)   | C8-C9-C17-Fe1   | -59.47(13)  |
| C10-C9-C17-Fe1 | 122.60(19)  | C4-Fe1-C17-C6   | 119.15(16)  | C2-Fe1-C17-C6   | 40.3(3)     |
| C5-Fe1-C17-C6  | 162.52(15)  | C1-Fe1-C17-C6   | -160.7(3)   | C3-Fe1-C17-C6   | 76.18(17)   |
| C7-Fe1-C17-C6  | -37.79(12)  | C8-Fe1-C17-C6   | -81.70(13)  | C9-Fe1-C17-C6   | -119.87(17) |
| C4-Fe1-C17-C9  | -120.98(16) | C2-Fe1-C17-C9   | 160.2(3)    | C5-Fe1-C17-C9   | -77.61(17)  |
| C1-Fe1-C17-C9  | -40.8(3)    | C3-Fe1-C17-C9   | -163.95(14) | C7-Fe1-C17-C9   | 82.08(12)   |
| C8-Fe1-C17-C9  | 38.17(11)   | C6-Fe1-C17-C9   | 119.87(17)  |                 |             |

**Table 5.** Anisotropic atomic displacement parameters ( $\text{\AA}^2$ ) for compound **3a**

|     | U11         | U22         | U33         | U23         | U13          | U12          |
|-----|-------------|-------------|-------------|-------------|--------------|--------------|
| Fe1 | 0.03052(15) | 0.02916(15) | 0.02717(15) | 0.00129(10) | -0.00173(10) | -0.00032(10) |
| N1  | 0.0296(8)   | 0.0360(9)   | 0.0480(10)  | 0.0076(8)   | -0.0040(7)   | -0.0020(7)   |
| N2  | 0.0295(8)   | 0.0381(9)   | 0.0470(10)  | 0.0078(8)   | -0.0045(7)   | -0.0030(7)   |
| N3  | 0.0283(7)   | 0.0293(8)   | 0.0309(8)   | -0.0006(6)  | -0.0010(6)   | -0.0013(6)   |
| C15 | 0.0353(9)   | 0.0295(9)   | 0.0280(9)   | -0.0022(7)  | 0.0025(7)    | 0.0015(7)    |
| C1  | 0.0599(16)  | 0.0560(15)  | 0.0545(15)  | -0.0102(12) | -0.0274(13)  | 0.0026(12)   |
| C2  | 0.0542(14)  | 0.0577(16)  | 0.0566(15)  | -0.0107(12) | -0.0011(12)  | -0.0207(12)  |
| C3  | 0.092(2)    | 0.0344(12)  | 0.0607(16)  | -0.0118(10) | -0.0228(12)  | 0.0056(12)   |
| C4  | 0.0460(14)  | 0.105(2)    | 0.0632(17)  | -0.0496(15) | 0.0056(11)   | -0.0008(14)  |
| C5  | 0.104(2)    | 0.0678(18)  | 0.0297(12)  | 0.0002(11)  | -0.0044(13)  | -0.0361(17)  |

|     |            |            |            |            |             |             |
|-----|------------|------------|------------|------------|-------------|-------------|
| C6  | 0.0457(11) | 0.0350(10) | 0.0314(10) | 0.0056(8)  | -0.0073(8)  | 0.0038(8)   |
| C7  | 0.0416(11) | 0.0410(11) | 0.0298(10) | 0.0046(8)  | 0.0057(8)   | -0.0009(9)  |
| C8  | 0.0356(10) | 0.0325(10) | 0.0321(10) | -0.0008(8) | 0.0046(8)   | 0.0041(8)   |
| C9  | 0.0296(9)  | 0.0299(9)  | 0.0283(9)  | -0.0020(7) | -0.0024(7)  | 0.0002(7)   |
| C10 | 0.0281(8)  | 0.0284(9)  | 0.0310(9)  | -0.0028(7) | 0.0005(7)   | 0.0000(7)   |
| C11 | 0.0416(11) | 0.0362(11) | 0.0417(11) | 0.0033(9)  | -0.0029(9)  | -0.0065(8)  |
| C12 | 0.0571(14) | 0.0372(11) | 0.0471(13) | 0.0067(10) | 0.0051(10)  | -0.0047(10) |
| C13 | 0.0632(15) | 0.0488(14) | 0.0422(12) | 0.0141(10) | 0.0052(11)  | 0.0122(11)  |
| C14 | 0.0443(13) | 0.0649(16) | 0.0513(14) | 0.0170(12) | -0.0043(10) | 0.0073(11)  |
| N4  | 0.0359(9)  | 0.0544(11) | 0.0454(10) | 0.0118(9)  | -0.0038(8)  | -0.0022(8)  |
| C16 | 0.0264(8)  | 0.0332(9)  | 0.0314(9)  | 0.0021(7)  | 0.0002(7)   | -0.0025(7)  |
| C17 | 0.0298(9)  | 0.0373(10) | 0.0339(10) | -0.0012(8) | -0.0072(7)  | 0.0030(8)   |

**Table 6.** Hydrogen atomic coordinates and isotropic atomic displacement parameters ( $\text{\AA}^2$ ) for compound **3a**

|     | x/a    | y/b    | z/c    | U(eq) |
|-----|--------|--------|--------|-------|
| H1  | 0.9710 | 0.7957 | 1.0321 | 0.069 |
| H2  | 0.9813 | 0.8948 | 0.9135 | 0.068 |
| H3  | 0.6126 | 0.9521 | 0.9177 | 0.076 |
| H4  | 0.3591 | 0.8855 | 1.0407 | 0.085 |
| H5  | 0.5897 | 0.7884 | 1.1131 | 0.081 |
| H6  | 0.4160 | 0.8622 | 0.6990 | 0.045 |
| H7  | 0.8030 | 0.8109 | 0.6951 | 0.045 |
| H8  | 0.8073 | 0.7092 | 0.8159 | 0.04  |
| H11 | 0.0692 | 0.5064 | 1.1036 | 0.048 |
| H12 | 0.1414 | 0.4233 | 1.2360 | 0.056 |
| H13 | 0.4998 | 0.4166 | 1.3229 | 0.062 |
| H14 | 0.7716 | 0.4908 | 1.2755 | 0.064 |
| H16 | 0.6673 | 0.6383 | 1.0095 | 0.036 |
| H17 | 0.1692 | 0.7926 | 0.8227 | 0.041 |
